# Supplementary material
Source: publisher figshare collection journal article supplement (https://acs.figshare.com/ndownloader/files/5133856)

## Supporting Information

### Synthesis of the Core Structure of Acutumine

Matthew D. Reeder, G. S. C. Srikanth, Spencer B. Jones, and Steven L. Castle\*

*Department of Chemistry and Biochemistry  
Brigham Young University, Provo, Utah, 84602*

#### General Experimental Details

Ether, methanol, methylene chloride, tetrahydrofuran, and toluene were dried by passage through a Glass Contour solvent drying system containing cylinders of activated alumina.<sup>1</sup> Flash chromatography was carried out using 60–230 mesh silica gel. <sup>1</sup>H NMR spectra were obtained on Varian 200, 300, or 500 MHz spectrometers with chloroform (7.27 ppm) or benzene (7.16 ppm) as internal reference. Signals are reported as follows: s (singlet), d (doublet), t (triplet), q (quartet), dd (doublet of doublets), dt (doublet of triplets), br s (broad singlet), m (multiplet). Coupling constants are reported in hertz (Hz). <sup>13</sup>C NMR spectra were obtained on Varian spectrometers operating at 50, 75, or 125 MHz with chloroform (77.23 ppm) or benzene (128.06 ppm) as internal reference. Infrared spectra were obtained on a Nicolet Avatar 360 FT-IR Spectrometer. Mass spectral data (EI, FAB) and were obtained from the Brigham Young University mass spectrometry facility. X-ray crystallographic data were obtained from the Brigham Young University X-ray crystallography facility.

---

<sup>1</sup> Pangborn, A. B.; Giardello, M. A.; Grubbs, R. H.; Rosen, R. K.; Timmers, F. J. *Organometallics* **1996**, *15*, 1518.

**Methyl 3-(2,3,4-Trimethoxyphenyl)propionate (7).** A solution of *trans*-2,3,4-trimethoxycinnamic acid (**6**) (5.50 g, 23.1 mmol) in anhydrous CH<sub>3</sub>OH (80 mL) was treated with conc H<sub>2</sub>SO<sub>4</sub> (0.8 mL) and stirred at reflux for 12 h. The resulting mixture was diluted with H<sub>2</sub>O (300 mL) and extracted with CHCl<sub>3</sub> (4 × 78 mL). The combined organic layers were washed with satd aq NaHCO<sub>3</sub> (100 mL), dried (MgSO<sub>4</sub>), and concentrated in vacuo. The resultant crude methyl ester was dissolved in anhydrous CH<sub>3</sub>OH (22 mL) under Ar, treated with 10% Pd/C (0.11 g, 0.02 wt equiv), and stirred at rt under H<sub>2</sub> (1 atm) for 18 h. The mixture was filtered through a pad of Celite and concentrated in vacuo, affording **7** (5.49 g, 21.6 mmol, 94%) as an amber oil: <sup>1</sup>H NMR (CDCl<sub>3</sub>, 300 MHz) δ 6.84 (d, *J* = 8.4 Hz, 1H), 6.59 (d, *J* = 8.4 Hz, 1H), 3.89 (s, 3H), 3.86 (s, 3H), 3.84 (s, 3H), 3.67 (s, 3H), 2.88 (t, *J* = 8.1 Hz, 2H), 2.58 (t, *J* = 8.4 Hz, 2H); <sup>13</sup>C NMR (CDCl<sub>3</sub>, 75 MHz) δ 173.8, 152.6, 152.0, 142.3, 126.5, 123.9, 107.2, 61.0, 60.8, 56.1, 51.7, 35.1, 25.6; IR (film) ν<sub>max</sub> 2946, 1735, 1455, 1275, 1177, 1095 cm<sup>-1</sup>; HRMS (FAB) *m/z* 277.1064 (MNa<sup>+</sup>, C<sub>13</sub>H<sub>18</sub>O<sub>5</sub>Na requires 277.1052).

**2-Methyl-4-(2,3,4-trimethoxyphenyl)-butan-2-ol (8).** A flask charged with Mg turnings (cleaned by rinsing with 1 N HCl, H<sub>2</sub>O, and acetone, then dried overnight at 110 °C, 1.89 g, 79 mmol) was treated with a trace amount of I<sub>2</sub>, and the turnings were stirred vigorously until discoloration of Mg by the iodine occurred. Then, anhydrous Et<sub>2</sub>O (50 mL) was added, after which methyl iodide (1.8 mL, 9.9 mmol) was added to the resulting light yellow solution at rt under N<sub>2</sub>. When the solution began refluxing, the mixture was cooled to 0 °C. Methyl iodide was added every 5 min in 1.0 mL portions until a total of 4.8 mL (11.0 g, 79 mmol) had been added. The mixture was stirred at 0 °C for 30 min, after which a solution of **7** (5.2 g, 20 mmol) in anhydrous Et<sub>2</sub>O (5 mL) was added in 0.25

mL portions every 3 min. The resulting mixture was then stirred at 0 °C for 20 min, and the reaction was quenched with 0.1 N HCl (35 mL), extracted with Et<sub>2</sub>O (4 × 10 mL), dried (MgSO<sub>4</sub>), and concentrated in vacuo. Flash chromatography (3% acetone–hexanes elution) yielded **8** (4.3 g, 17 mmol, 85%) as a white solid: <sup>1</sup>H NMR (CDCl<sub>3</sub>, 300 MHz) δ 6.84 (d, *J* = 8.4 Hz, 1H), 6.61 (d, *J* = 8.4 Hz, 1H), 3.89 (s, 3H), 3.86 (s, 3H), 3.83 (s, 3H), 2.67–2.60 (m, 2H), 1.75–1.69 (m, 2H), 1.68–1.57 (br s, 1H), 1.28 (s, 6H); <sup>13</sup>C NMR (CDCl<sub>3</sub>, 75 MHz) δ 152.2, 151.9, 142.5, 128.8, 123.8, 107.6, 71.1, 61.1, 60.9, 56.2, 45.3, 29.4 (2C), 24.9; IR (film)  $\nu_{\max}$  3440, 2956, 1600, 1465, 1276, 1096 cm<sup>-1</sup>; HRMS (FAB) *m/z* 277.1433 (MNa<sup>+</sup>, C<sub>14</sub>H<sub>22</sub>O<sub>4</sub>Na requires 277.1415).

**4,5,6-Trimethoxy-1,1-dimethylindan (9).** A solution of **8** (3.00 g, 11.8 mmol) in anhydrous Et<sub>2</sub>O (5 mL, syringe rinsed with an additional 0.5 mL) was added dropwise to conc H<sub>2</sub>SO<sub>4</sub> (6.5 g, 66 mmol) at 0 °C. The resulting brown mixture was stirred at 0 °C for 1 h, then diluted with H<sub>2</sub>O (20 mL, brown color disappeared) and Et<sub>2</sub>O (10 mL). The layers were separated, and the aqueous layer was extracted with Et<sub>2</sub>O (5 mL). The combined organic layers were washed with satd aq K<sub>2</sub>CO<sub>3</sub> (5 mL) and H<sub>2</sub>O (5 mL), then dried (MgSO<sub>4</sub>) and concentrated in vacuo. Flash chromatography (10% acetone–hexanes elution) afforded **9** (2.36 g, 9.99 mmol, 85%) as a light yellow oil: <sup>1</sup>H NMR (CDCl<sub>3</sub>, 200 MHz) δ 6.43 (s, 1H), 3.89 (s, 3H), 3.85 (s, 3H), 3.84 (s, 3H), 2.82 (t, *J* = 8.0 Hz, 2H), 1.90 (t, *J* = 8.0 Hz, 2H), 1.22 (s, 6H); <sup>13</sup>C NMR (CDCl<sub>3</sub>, 75 MHz) δ 153.2, 149.6, 148.6, 140.6, 126.8, 101.5, 61.2, 60.5, 56.5, 44.7, 41.7, 28.8 (2C), 26.9; IR (film)  $\nu_{\max}$  2944, 1592, 1465, 1328, 1207, 1113, 1042 cm<sup>-1</sup>; HRMS (EI) *m/z* 236.1398 (MH<sup>+</sup>, C<sub>14</sub>H<sub>20</sub>O<sub>3</sub> requires 236.1538).

**5,6,7-Trimethoxy-3,3-dimethylindan-4-carbaldehyde (10).** A solution of hexamethylenetetramine (0.42 g, 3.0 mmol) in trifluoroacetic acid (5 mL) was treated slowly with **9** (0.35 g, 1.5 mmol). The resulting mixture was refluxed for 12 h. Water (20 mL) was then added with stirring, and the mixture was stirred at 50 °C for 1 h and subsequently cooled to 10–20 °C. The mixture was extracted with EtOAc (2 × 50 mL), and the combined organic layers were washed with brine (25 mL), dried (MgSO<sub>4</sub>), and concentrated in vacuo. Flash chromatography (3% acetone–hexanes elution) yielded **10** (0.32 g, 1.2 mmol, 82%) as a yellow oil: <sup>1</sup>H NMR (CDCl<sub>3</sub>, 200 MHz) δ 10.36 (s, 1H), 4.01 (s, 3H), 3.94 (s, 3H), 3.87 (s, 3H), 2.81 (t, *J* = 8.0 Hz, 2H), 1.92 (t, *J* = 8.0 Hz, 2H), 1.37 (s, 6H); <sup>13</sup>C NMR (CDCl<sub>3</sub>, 75 MHz) δ 192.3, 158.3, 154.8, 150.2, 143.6, 132.7, 122.2, 62.6, 61.1, 60.5, 47.0, 43.6, 27.0 (2C), 26.8; IR (film) ν<sub>max</sub> 2945, 1780, 1685, 1564, 1463, 1317, 1173, 1111 cm<sup>-1</sup>; HRMS (FAB) *m/z* 287.1346 (MNa<sup>+</sup>, C<sub>15</sub>H<sub>20</sub>O<sub>4</sub>Na requires 287.1376).

**6,7-Dimethoxy-3,3-dimethylindan-5-ol (5).** A solution of **10** (1.32 g, 4.99 mmol) in anhydrous CH<sub>2</sub>Cl<sub>2</sub> (25 mL) at –78 °C under N<sub>2</sub> was treated with BBr<sub>3</sub> (0.94 mL, 2.51 g, 10.0 mmol). The resulting mixture was stirred at –78 °C for 10 min, then poured into vigorously stirring satd aq NaHCO<sub>3</sub> (25 mL). The layers were separated, and the organic layer was dried (MgSO<sub>4</sub>) then concentrated in vacuo. The crude phenol was then dissolved in anhydrous toluene (80 mL) and treated with propylene glycol (4.10 g, 53.9 mmol) and TsOH (1.28 g, 6.73 mmol). The resulting mixture was refluxed for 90 min, then the reaction was quenched with satd aq NaHCO<sub>3</sub> (50 mL) and diluted with EtOAc (10 mL). The layers were separated, and the organic layer was dried (MgSO<sub>4</sub>) and concentrated in vacuo. Flash chromatography (10% acetone–hexanes elution)

afforded **5** (772 mg, 3.47 mmol, 70%) as a white solid:  $^1\text{H}$  NMR ( $\text{CDCl}_3$ , 300 MHz)  $\delta$  6.51 (s, 1H), 5.62 (s, 1H), 3.90 (s, 3H), 3.89 (s, 3H), 2.84 (t,  $J = 7.2$  Hz, 2H), 1.90 (t,  $J = 7.2$  Hz, 2H), 1.21 (s, 6H);  $^{13}\text{C}$  NMR ( $\text{CDCl}_3$ , 75 MHz)  $\delta$  149.5, 148.7, 148.5, 137.5, 125.8, 103.9, 61.3, 60.1, 44.4, 41.6, 28.7 (2C), 27.0; IR (film)  $\nu_{\text{max}}$  3410, 2949, 1585, 1462, 1316, 1151, 1090  $\text{cm}^{-1}$ ; HRMS (FAB)  $m/z$  245.1153 ( $\text{MNa}^+$ ,  $\text{C}_{13}\text{H}_{18}\text{O}_3\text{Na}$  requires 245.1161).

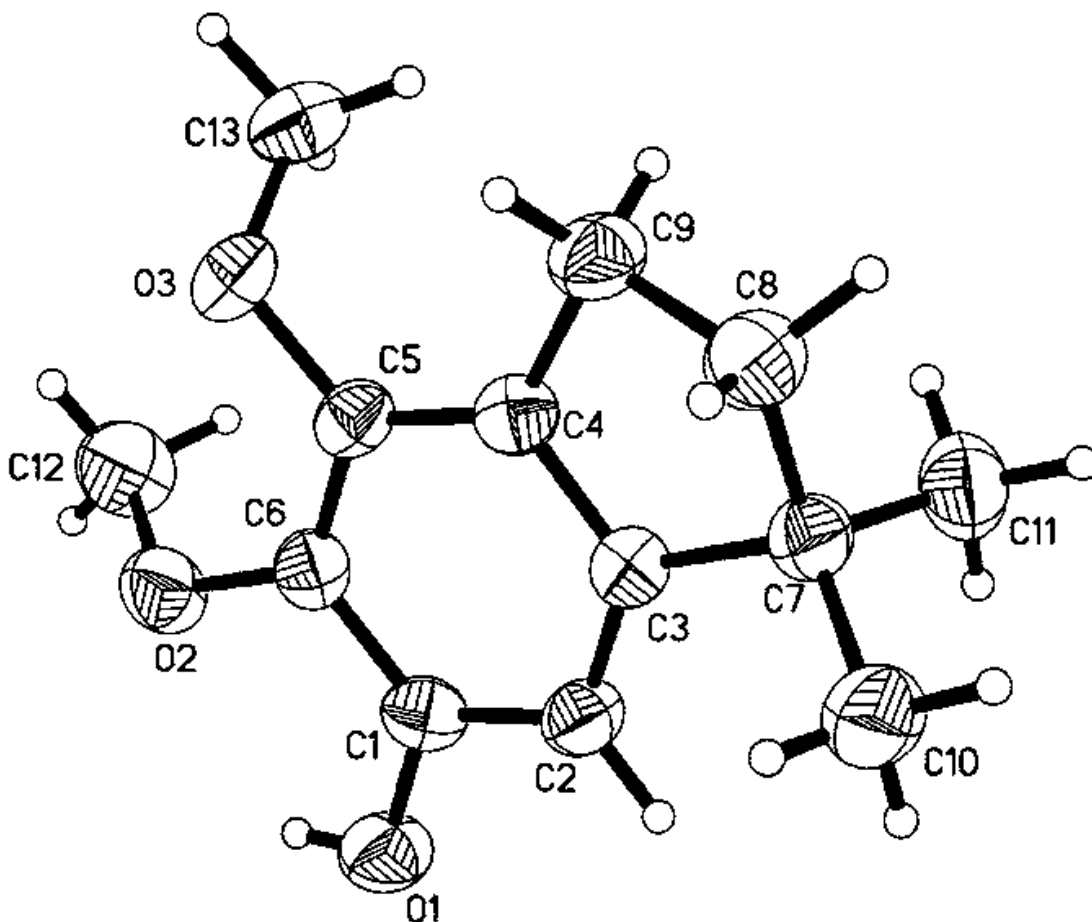

**Figure S1. ORTEP Diagram of 5.**

**6,6,7-Trimethoxy-3,3-dimethyl-1,2,3,6-tetrahydroinden-5-one (4).** A solution of **5** (2.20 g, 9.90 mmol) in anhydrous  $\text{CH}_3\text{OH}$  (80 mL) was added to a mixture of  $\text{KHCO}_3$  (2.38 g, 23.7 mmol),  $\text{PhI}(\text{OAc})_2$  (3.51 g, 10.9 mmol), and anhydrous  $\text{CH}_3\text{OH}$  (80

mL) at 0 °C under N<sub>2</sub>. The resulting yellow-orange mixture was stirred for 10 min, diluted with CH<sub>2</sub>Cl<sub>2</sub> (100 mL), and washed with brine (200 mL). The layers were separated, and the organic layer was dried (MgSO<sub>4</sub>) and concentrated in vacuo, affording **4** (2.40 g, 9.51 mmol, 96%) as a yellow oil: <sup>1</sup>H NMR (CDCl<sub>3</sub>, 300 MHz) δ 5.72 (s, 1H), 4.03 (s, 3H), 3.29 (s, 6H), 2.68 (t, *J* = 8.0 Hz, 2H), 1.70 (t, *J* = 8.0 Hz, 2H), 1.16 (s, 6H); <sup>13</sup>C NMR (CDCl<sub>3</sub>, 75 MHz) δ 194.4, 175.5, 153.6, 119.3, 111.4, 94.1, 58.9, 50.9 (2C), 43.8, 39.0, 31.5, 26.8, 25.1; IR (film) ν<sub>max</sub> 2955, 1724, 1452, 1217, 1096 cm<sup>-1</sup>; HRMS (FAB) *m/z* 275.1274 (MNa<sup>+</sup>, C<sub>14</sub>H<sub>20</sub>O<sub>4</sub>Na requires 275.1259).

**5-Allyl-6,6,7-trimethoxy-3,3-dimethyl-2,3,5,6-tetrahydro-1H-inden-5-ol (11).**

A solution of **4** (3.84 g, 15.2 mmol) in anhydrous Et<sub>2</sub>O (100 mL) at 0°C under N<sub>2</sub> was treated dropwise with allylmagnesium chloride (2.0 M soln in THF, 11.4 mL, 22.8 mmol). The resulting mixture was stirred for 15 min, and the reaction was quenched by the addition of H<sub>2</sub>O (30 mL). The layers were separated, and the organic layer was dried (MgSO<sub>4</sub>) and concentrated in vacuo. This afforded crude **11** (4.41 g, 15.0 mmol) that was used directly in the subsequent transformation: <sup>1</sup>H NMR (Benzene-*d*<sub>6</sub>, 300 MHz) δ 6.36–6.13 (m, 1H), 5.30 (s, 1H), 5.14–5.11 (m, 1H), 5.05 (t, *J* = 1.5 Hz, 1H), 3.60 (s, 3H), 3.45 (s, 3H), 3.25 (s, 3H), 3.13 (s, 1H), 2.68 (d, *J* = 11.1 Hz, 2H), 2.51–2.36 (m, 1H), 2.35–2.18 (m, 1H), 1.39 (t, *J* = 11.1 Hz, 2H), 1.00 (s, 3H), 0.98 (s, 3H); <sup>13</sup>C NMR (Benzene-*d*<sub>6</sub>, 75 MHz) δ 148.8, 146.6, 135.4, 126.4, 122.8, 117.1, 102.2, 81.2, 60.1, 51.4, 50.7, 41.2, 40.6, 40.4, 28.1, 27.5, 24.9; IR (film) ν<sub>max</sub> 3504, 2949, 1636, 1452, 1210, 1053, 908 cm<sup>-1</sup>; HRMS (FAB) *m/z* 317.1742 (MNa<sup>+</sup>, C<sub>17</sub>H<sub>26</sub>O<sub>4</sub>Na requires 317.1729).

**3a-Allyl-6,6,7-trimethoxy-3,3-dimethyl-1,2,3,3a,4,6-hexahydroinden-5-one**

**(12).** A mixture of 18-crown-6 (12.3 g, 46.5 mmol), KO*t*-Bu (5.05 g, 45.0 mmol), and

anhydrous THF (250 mL) at 0°C under N<sub>2</sub> was stirred for 15 min, then treated with a solution of **11** (4.41 g, 15.0 mmol) in anhydrous THF (50 mL, added over 3 min). The resulting mixture was stirred at 0°C under N<sub>2</sub> for 1 h. The reaction was quenched by the addition of H<sub>2</sub>O (100 mL) and diluted with Et<sub>2</sub>O (200 mL). The layers were separated, and the organic layer was dried (MgSO<sub>4</sub>) and concentrated in vacuo. Flash chromatography (1% Et<sub>3</sub>N in 10% EtOAc–hexanes elution) afforded **12** (2.68 g, 9.10 mmol, 60% over two steps) as a colorless oil: <sup>1</sup>H NMR (Benzene-*d*<sub>6</sub>, 500 MHz) δ 5.81–5.68 (m, 1H), 4.96 (s, 1H), 4.93 (d, *J* = 6.0 Hz, 1H), 3.71 (s, 3H), 3.45 (s, 3H), 3.35 (s, 3H), 2.64 (d, *J* = 13.5 Hz, 1H), 2.54–2.46 (m, 1H), 2.27 (d, *J* = 13.0 Hz, 1H), 2.19–2.12 (m, 1H), 1.98 (d, *J* = 7.5 Hz, 2H), 1.56–1.49 (m, 1H), 1.24–1.18 (m, 1H), 0.73 (s, 3H), 0.71 (s, 3H); <sup>13</sup>C NMR (Benzene-*d*<sub>6</sub>, 125 MHz) δ 202.5, 146.0, 136.1, 135.4, 118.1, 98.0, 60.1, 52.1, 51.2, 51.0, 44.2, 42.7, 41.8, 36.6, 26.6, 23.6, 22.0; IR (film) ν<sub>max</sub> 2952, 1732, 1450, 1063 cm<sup>−1</sup>; HRMS (FAB) *m/z* 317.1714 (MNa<sup>+</sup>, C<sub>17</sub>H<sub>26</sub>O<sub>4</sub>Na requires 317.1729).

**6,6,7-Trimethoxy-3,3-dimethyl-3a(2-methylaminoethyl)-1,2,3,3a,4,6-hexahydroinden-5-one (3).** A solution of **12** (50 mg, 0.17 mmol) in EtOAc (28 mL, 0.006 M) at −78 °C was treated with O<sub>3</sub> (bubbled for 1.25 min). Et<sub>3</sub>N (71 μL, 52 mg, 0.51 mmol) was then added and the resulting mixture was stirred at rt for 16 h then concentrated in vacuo. This procedure was repeated twice.

The three crude mixtures of aldehyde and **12** (derived from 150 mg of **12**) were combined and dissolved in anhydrous CH<sub>3</sub>OH (200 μL), treated with powdered 4Å molecular sieves (30 mg) and CH<sub>3</sub>NH<sub>2</sub> (2.0 M in CH<sub>3</sub>OH, 410 μL, 0.82 mmol), and stirred at rt under N<sub>2</sub> for 30 min. NaBH<sub>3</sub>CN (26 mg, 0.41 mmol) was then added and the resulting mixture was stirred at rt under N<sub>2</sub> for 16 h. It was then diluted with EtOAc (3

mL), washed with aq KOH (10 M, 1 mL), and the aqueous layer was extracted with EtOAc (2 × 4 mL). The combined organic layers were dried (Na<sub>2</sub>SO<sub>4</sub>) and concentrated in vacuo. Flash chromatography (SiO<sub>2</sub>, 1% Et<sub>3</sub>N in 5–10% EtOAc–hexanes gradient elution) afforded recovered **12** (73 mg, 49% recovery) and **3** (59.4 mg, 0.191 mmol, 37%, 73% based on recovered **12**) as a colorless oil that solidified on standing: <sup>1</sup>H NMR (Benzene-*d*<sub>6</sub>, 500 MHz) δ 3.64 (s, 3H), 3.53 (s, 3H), 3.38 (s, 3H), 3.03 (dt, *J* = 3.5, 12.5 Hz, 1H), 2.88 (s, 3H), 2.74 (ddd, *J* = 2.0, 5.0, 12.0 Hz, 1H), 2.44–2.36 (m, 1H), 2.06 (ddd, *J* = 1.5, 10.5, 18.0 Hz, 1H), 1.76 (dd, *J* = 3.0, 11.5 Hz, 1H), 1.55 (dt, *J* = 5.0, 12.5 Hz, 1H), 1.49 (d, *J* = 11.5 Hz, 1H), 1.49–1.43 (m, 1H), 1.41–1.28 (m, 2H), 1.25 (ddd, *J* = 1.5, 9.0, 13.0 Hz, 1H), 0.79 (s, 3H), 0.71 (s, 3H); <sup>13</sup>C NMR (Benzene-*d*<sub>6</sub>, 125 MHz) δ 190.6, 149.2, 134.6, 100.5, 61.6, 52.8, 52.2, 49.8, 49.1, 42.7, 39.0, 37.4, 30.6, 27.9, 25.4, 23.5, 22.0; IR (film) ν<sub>max</sub> 3460, 2940, 1728, 1460, 1112 cm<sup>−1</sup>; HRMS (EI) *m/z* 334.1984 (MNa<sup>+</sup>, C<sub>17</sub>H<sub>29</sub>O<sub>4</sub>NNa requires 334.1985).

**4,5-Dimethoxy-7,10,10-trimethyl-7-azatricyclo[4.3.3.0<sup>1,6</sup>]**

**dodeca-2,4-dien-3-ol (13).** A solution of **3** (20 mg, 0.064 mmol) in anhydrous CH<sub>2</sub>Cl<sub>2</sub> (0.6 mL) at −10 °C was treated with powdered 4Å molecular sieves (32 mg) followed by TMSOTf (12 μL, 13.8 mg, 0.062 mmol). The resulting mixture was stirred at −10 °C for 10 min, treated with additional TMSOTf (12 μL, 13.8 mg, 0.062 mmol), and stirred for 5 min. The mixture was concentrated in vacuo, and all volatile materials were removed under high vacuum. The residue was purified by column chromatography (SiO<sub>2</sub>, 2 × 15 cm, 1% Et<sub>3</sub>N in 0–5% EtOAc–hexanes gradient elution) to afford **13** (8.9 mg, 0.032 mmol, 50%) as a colorless oil along with the O-

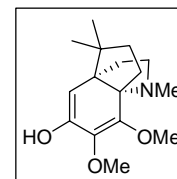



demethylated byproduct **14** (1.9 mg, 0.0072 mmol, 11%) as a pale yellow oil that solidified on standing.

For **13**:  $^1\text{H}$  NMR (Benzene- $d_6$ , 500 MHz)  $\delta$  5.67 (s, 1H), 3.76 (s, 3H), 3.60 (s, 3H), 2.71 (dd,  $J = 5.5, 12.0$  Hz, 1H), 2.41 (s, 3H), 2.27 (d,  $J = 16.5$  Hz, 1H), 2.24 (dt,  $J = 3.5, 11.5$  Hz, 1H), 2.04 (dd,  $J = 2.5, 11.0$  Hz, 1H), 1.88 (dd,  $J = 3.5, 16.5$  Hz, 1H), 1.69 (d,  $J = 10.5$  Hz, 1H), 1.51 (dt,  $J = 5.0, 13.0$  Hz, 1H), 1.21 (d,  $J = 11.5$  Hz, 1H), 0.88 (s, 3H), 0.86 (s, 3H);  $^{13}\text{C}$  NMR (Benzene- $d_6$ , 125 MHz)  $\delta$  142.4, 126.9, 118.3, 89.3, 60.7, 60.1, 53.6, 50.7, 46.2, 44.1, 41.8, 38.5, 33.1, 30.6, 26.0, 22.8; IR (film)  $\nu_{\text{max}}$  3421, 2920, 2854, 1662, 1460, 1254, 1064, 842  $\text{cm}^{-1}$ ; HRMS (FAB)  $m/z$  302.1733 ( $\text{MNa}^+$ ,  $\text{C}_{16}\text{H}_{25}\text{NO}_3\text{Na}$  requires 302.1732); 2D  $^1\text{H}$ - $^1\text{H}$  COSY NMR (Benzene- $d_6$ , 500 MHz) 5.67/1.88 (w, H-2/H-11), 2.71/2.23 (s, H-8/H-8), 2.71/1.51 (w, H-8/H-9), 2.27/1.88 (s, H-11/H-11), 2.23/1.51 (w, H-8/H-9), 2.04/1.69 (s, H-12/H-12), 1.51/1.21 (m, H-9/H-9); 2D  $^1\text{H}$ - $^{13}\text{C}$  HMQC (Benzene- $d_6$ , 500 MHz) 5.67/118.3 (m, H-2/C-2), 3.76/60.1 (s,  $\text{OCH}_3$ ), 3.60/60.7 (s,  $\text{OCH}_3$ ), 2.71/50.7 (m, H-8/C-8), 2.41/38.5 (s,  $\text{NCH}_3$ ), 2.27/46.2 (m, H-11/C-11), 2.23/50.7 (m, H-8/C-8), 2.04/41.8 (m, H-12/C-12), 1.88/46.2 (m, H-11/C-11), 1.69/41.8 (m, H-12/C-12), 1.21/33.1 (w, H-9/C-9) 0.88/26.0 (s,  $\text{CCH}_3$ ), 0.86/22.8 (s,  $\text{CCH}_3$ ).

For **14**:  $^1\text{H}$  NMR (Benzene- $d_6$ , 500 MHz)  $\delta$  3.64 (s, 3H), 2.68 (dd,  $J = 5.5, 12.0$  Hz, 1H), 2.44–2.30 (m, 1H), 2.26 (s, 3H), 2.21–2.13 (m, 2H), 1.84 (dd,  $J = 3.0, 12.0$  Hz, 1H), 1.79 (d,  $J = 12.0$  Hz, 1H), 1.47 (dt,  $J = 5.0, 13.0$  Hz, 1H), 1.30–1.24 (m, 1H), 1.08 (dd,  $J = 8.5, 12.5$  Hz, 1H), 0.77 (d,  $J = 16$  Hz, 1H), 0.61 (s, 3H), 0.44 (s, 3H);  $^{13}\text{C}$  NMR (Benzene- $d_6$ , 75 MHz)  $\delta$  191.3, 157.6, 149.3, 84.8, 60.0, 50.5, 49.4, 43.3, 40.8, 36.3,

30.6, 29.2, 25.7, 24.5, 21.7; IR (film)  $\nu_{\text{max}}$  3389, 2931, 1660, 1473, 1374, 1288, 1064  $\text{cm}^{-1}$ ; HRMS (EI)  $m/z$  266.1762 ( $\text{M}^+$ ,  $\text{C}_{15}\text{H}_{23}\text{NO}_3$  requires 266.1756).

SC-MDR-9 (CDCl<sub>3</sub>, 300 MHz)

Pulse Sequence: szpul

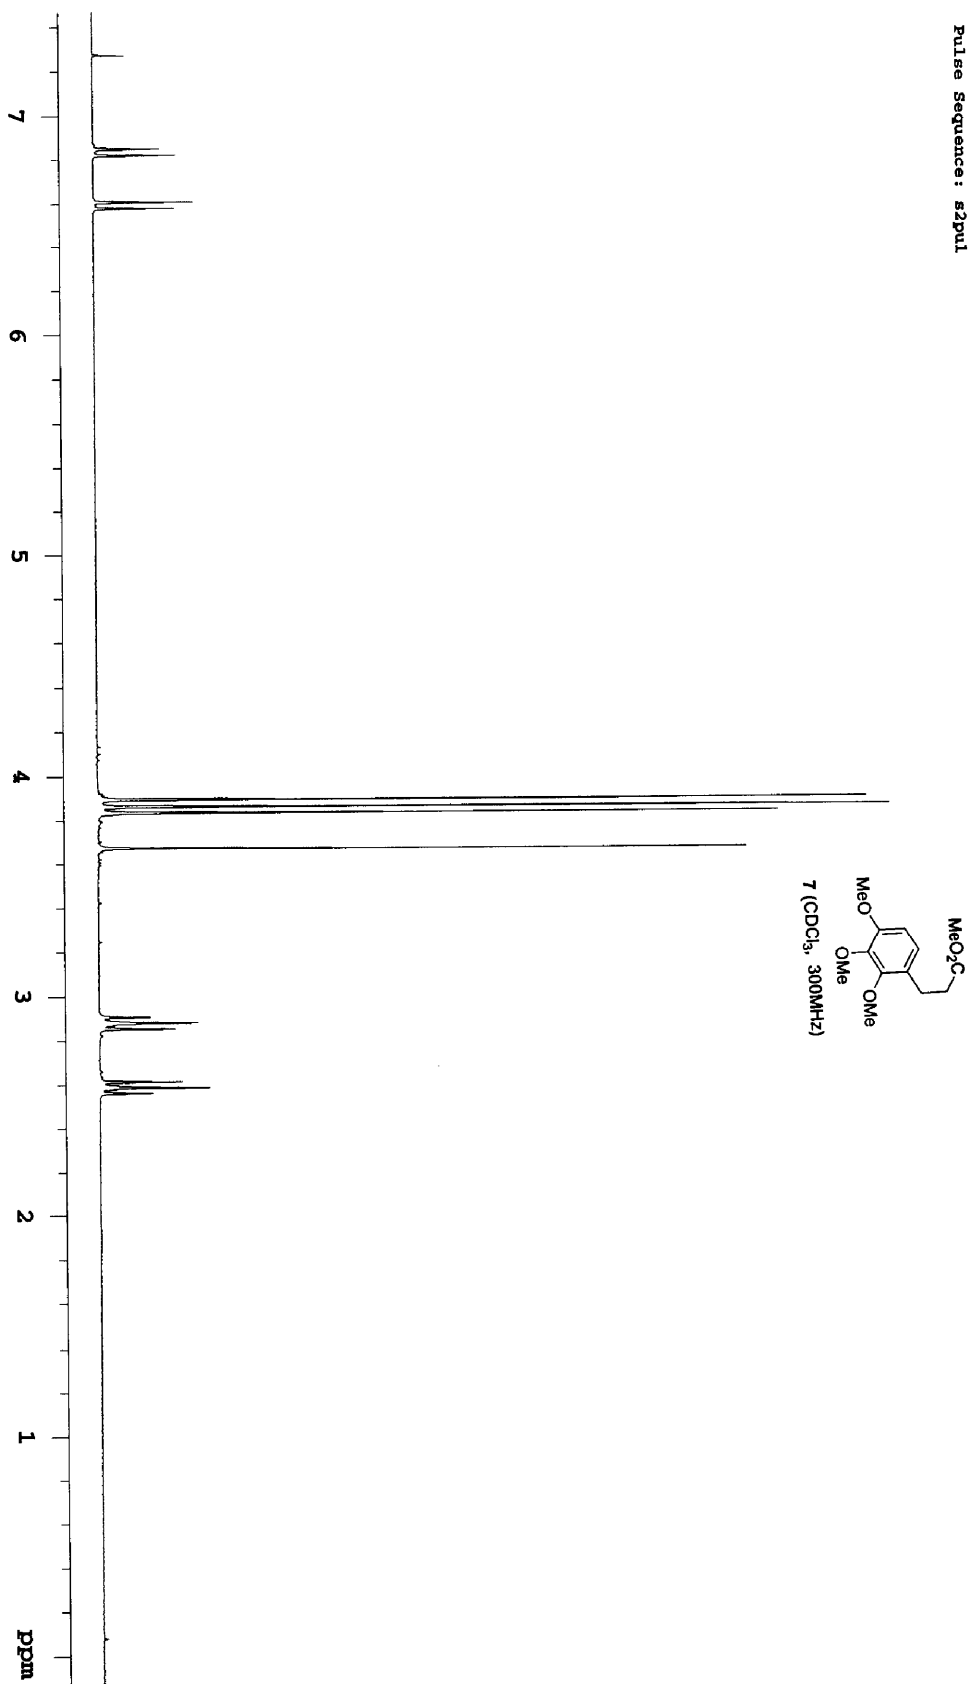

13C OBSERVE

Pulse Sequence: szpul

75 MHz

cdcl3

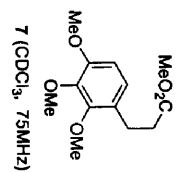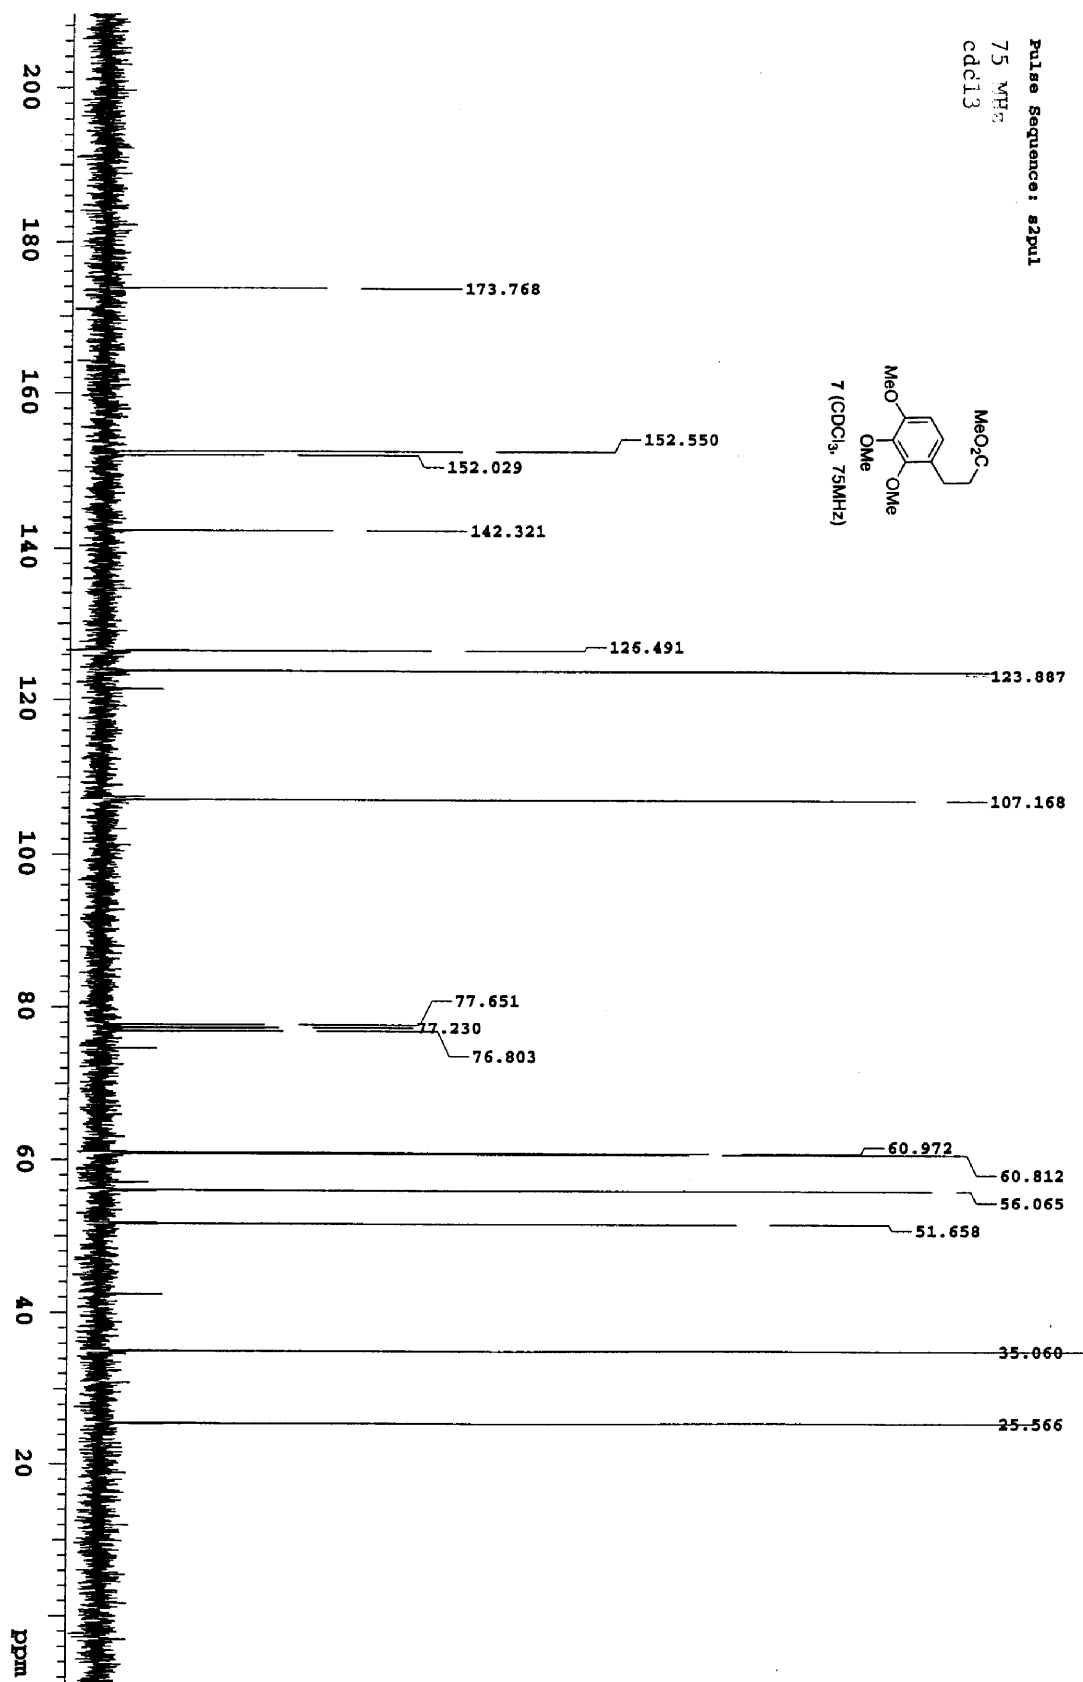

MDR-10-2 (CDCl<sub>3</sub>, 300 MHz)

Pulse Sequence: szpul

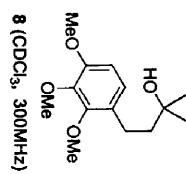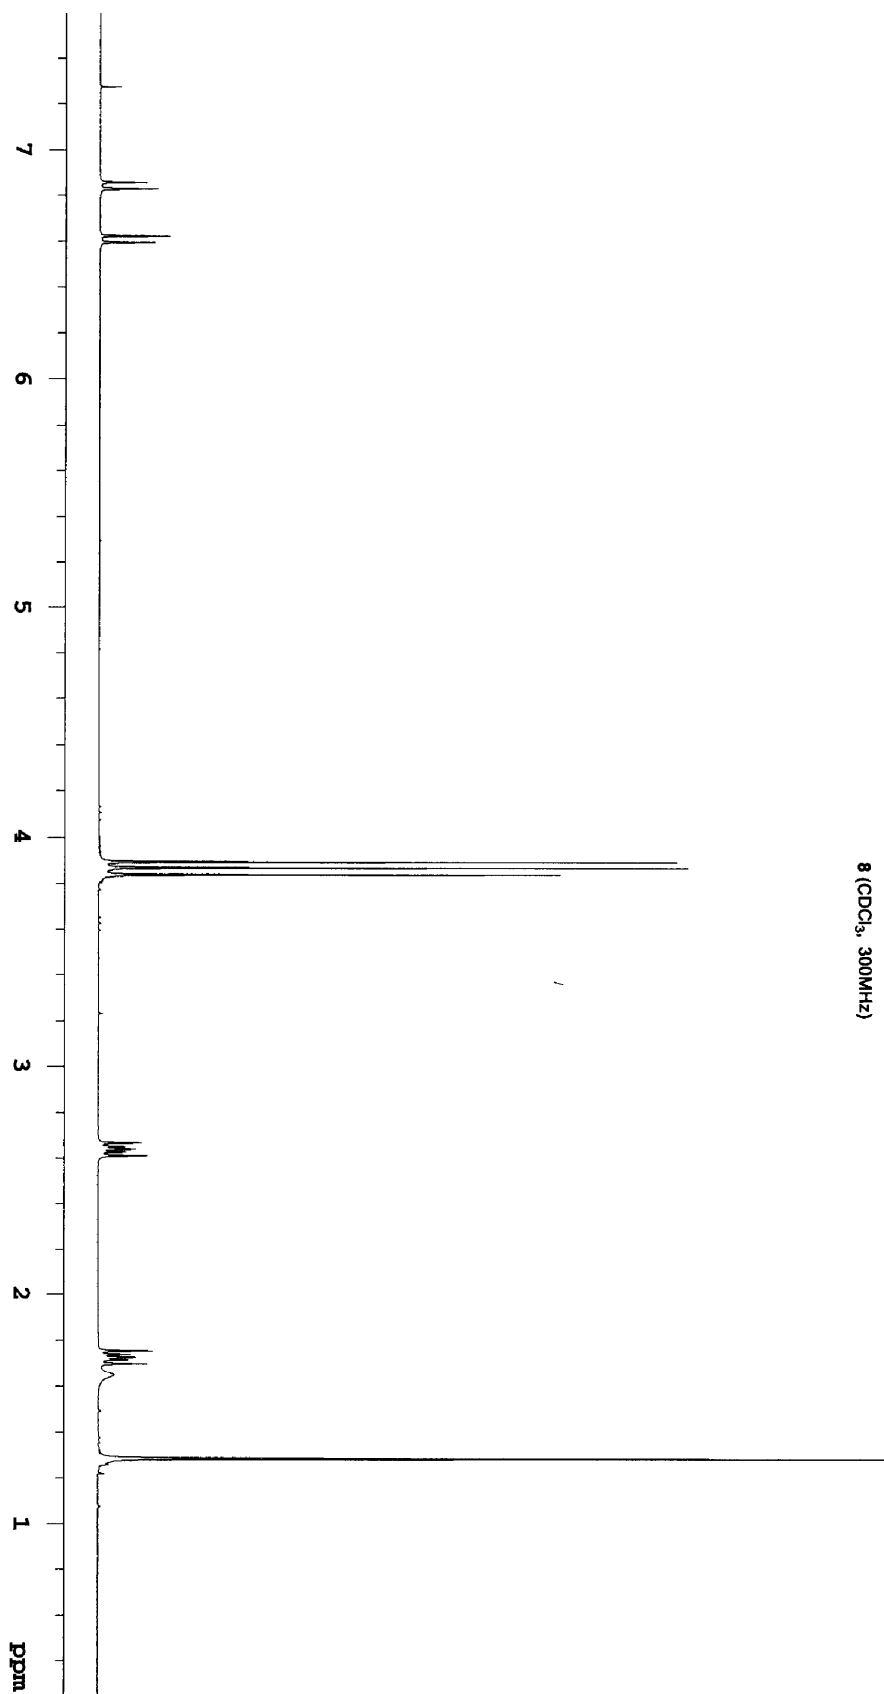

13C OBSERVE

Pulse Sequence: zgpg30

75 MHz

cdcl3

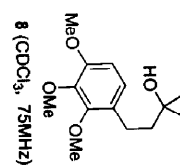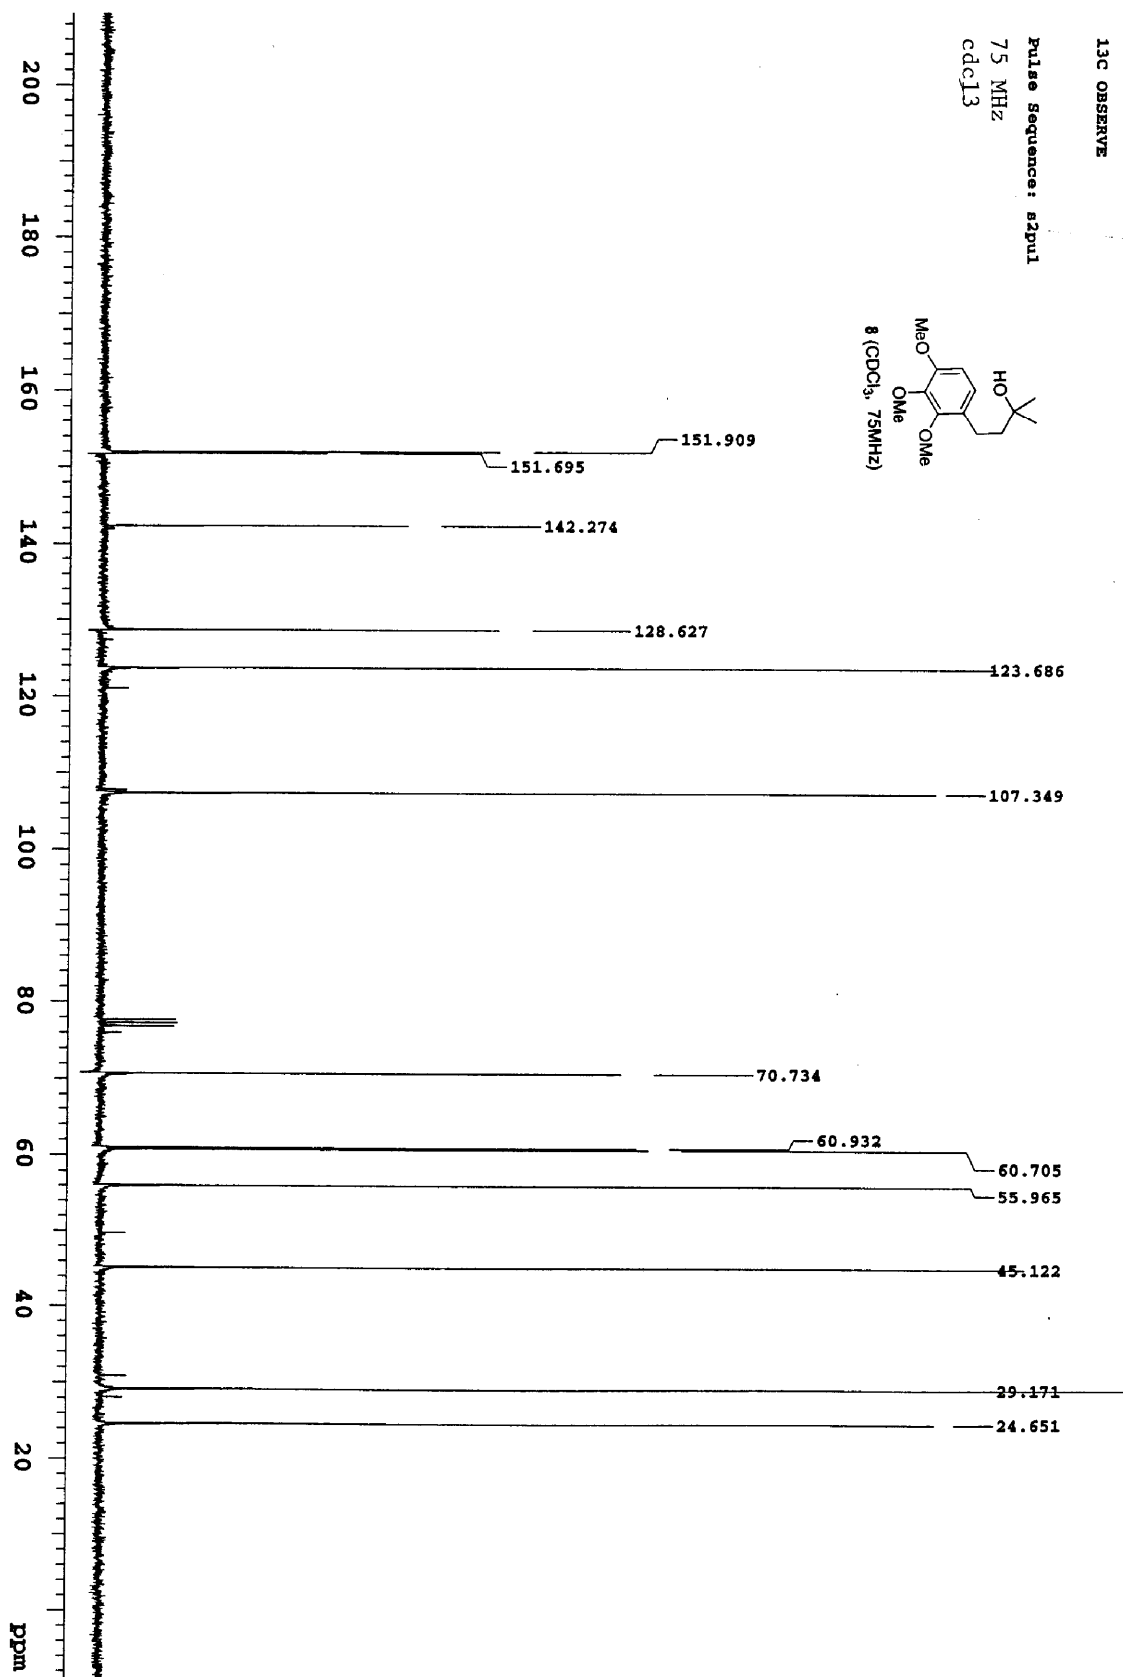

STANDARD 1H OBSERVE

Pulse Sequence: zgpg30

300 MHz  
cdcl3

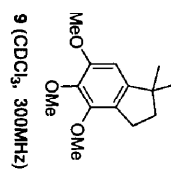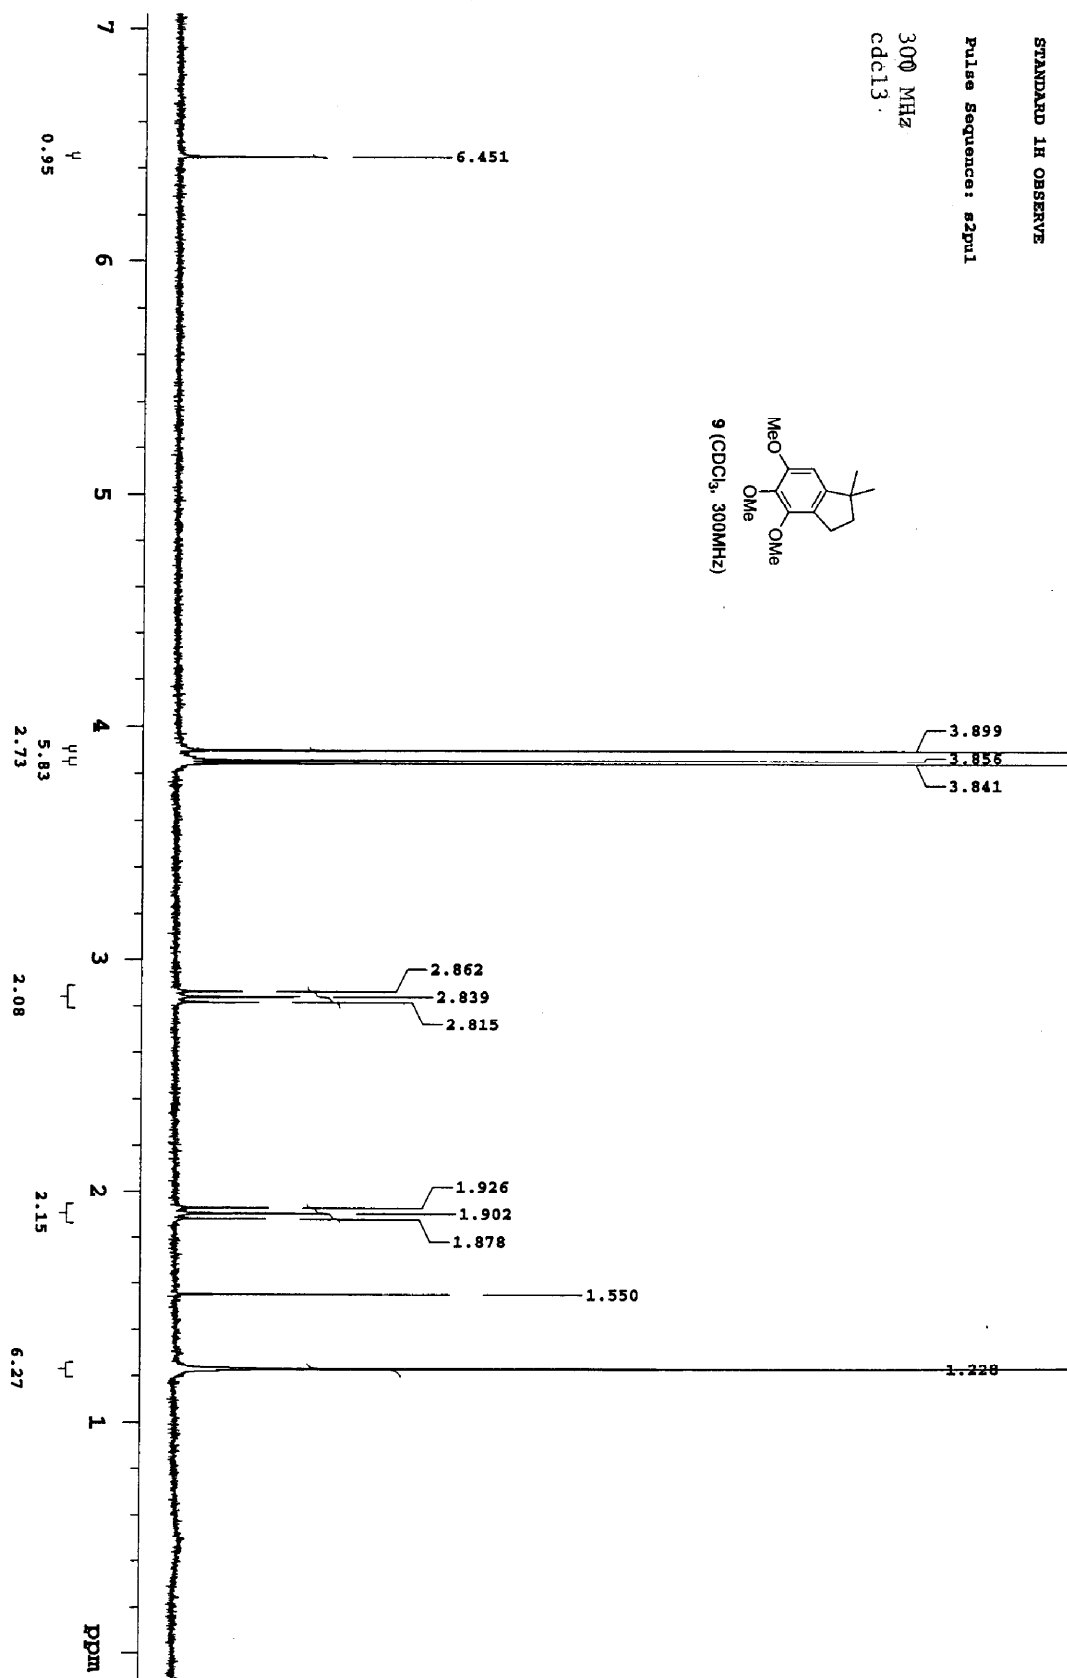

13C OBSERVE

Pulse Sequence: s2pul

75 MHz

cdcl3

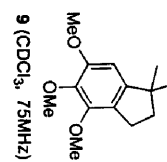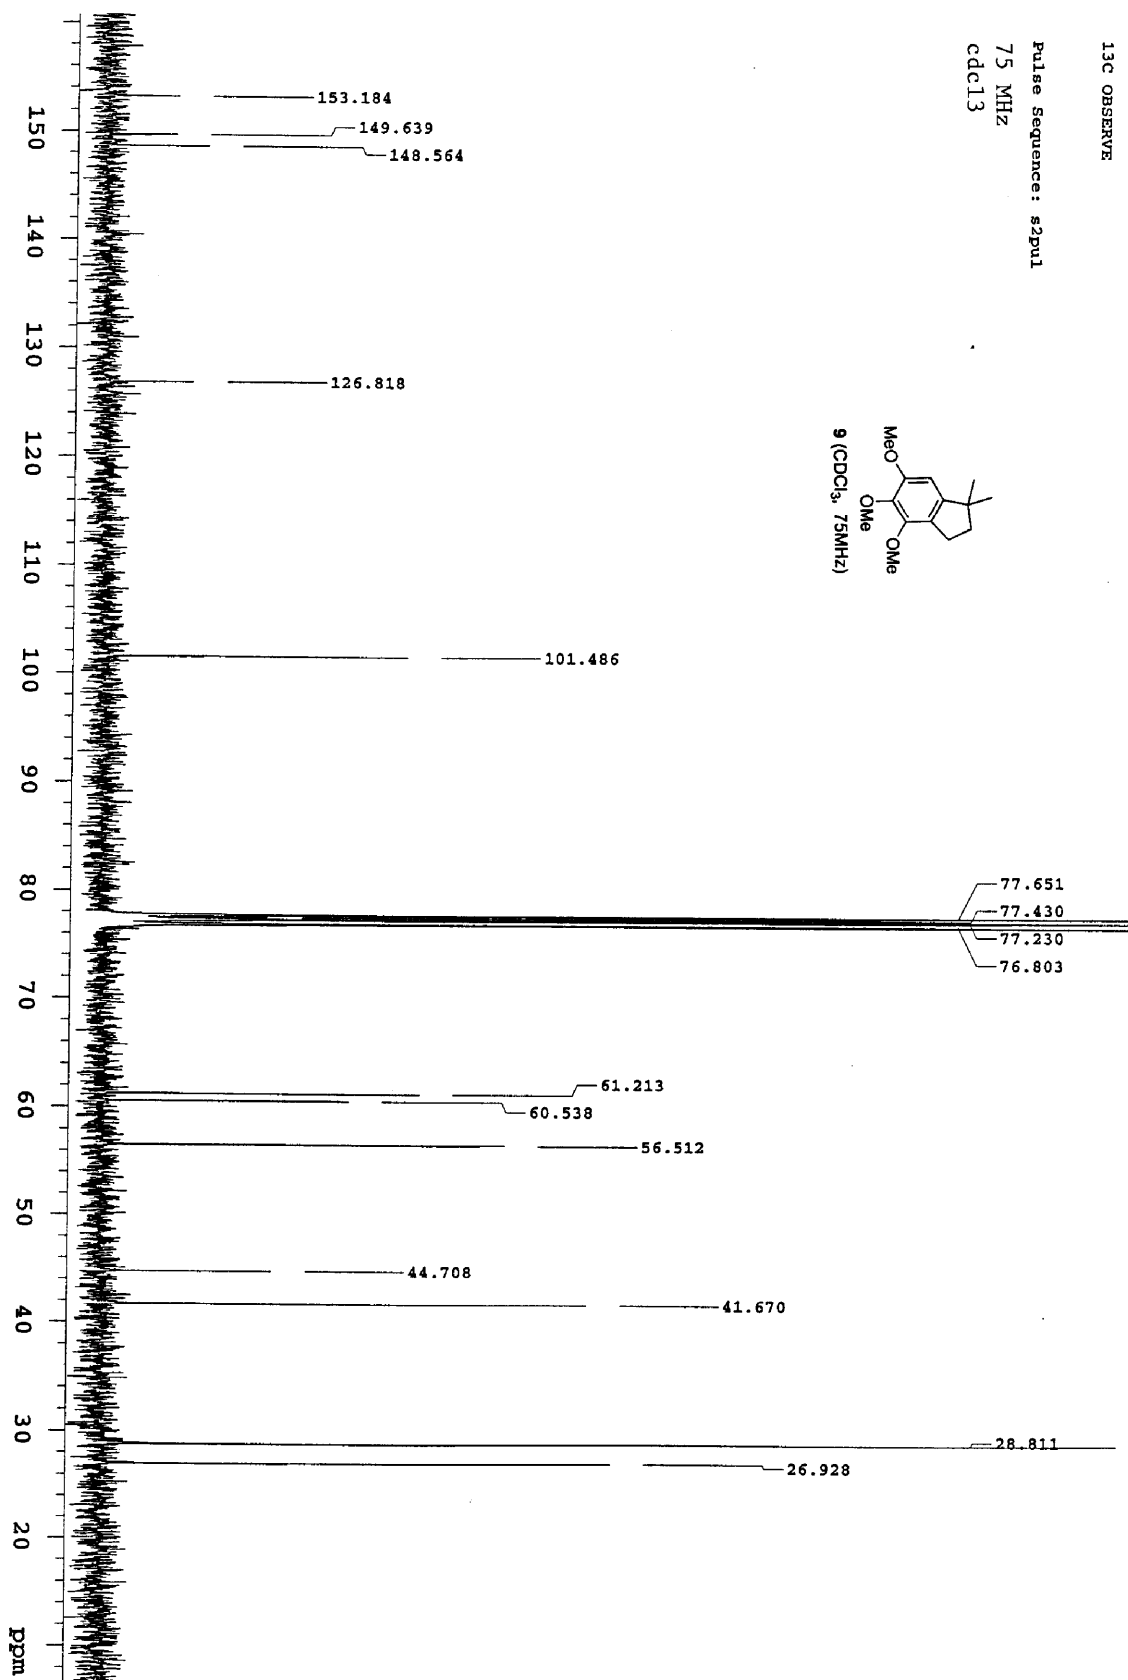



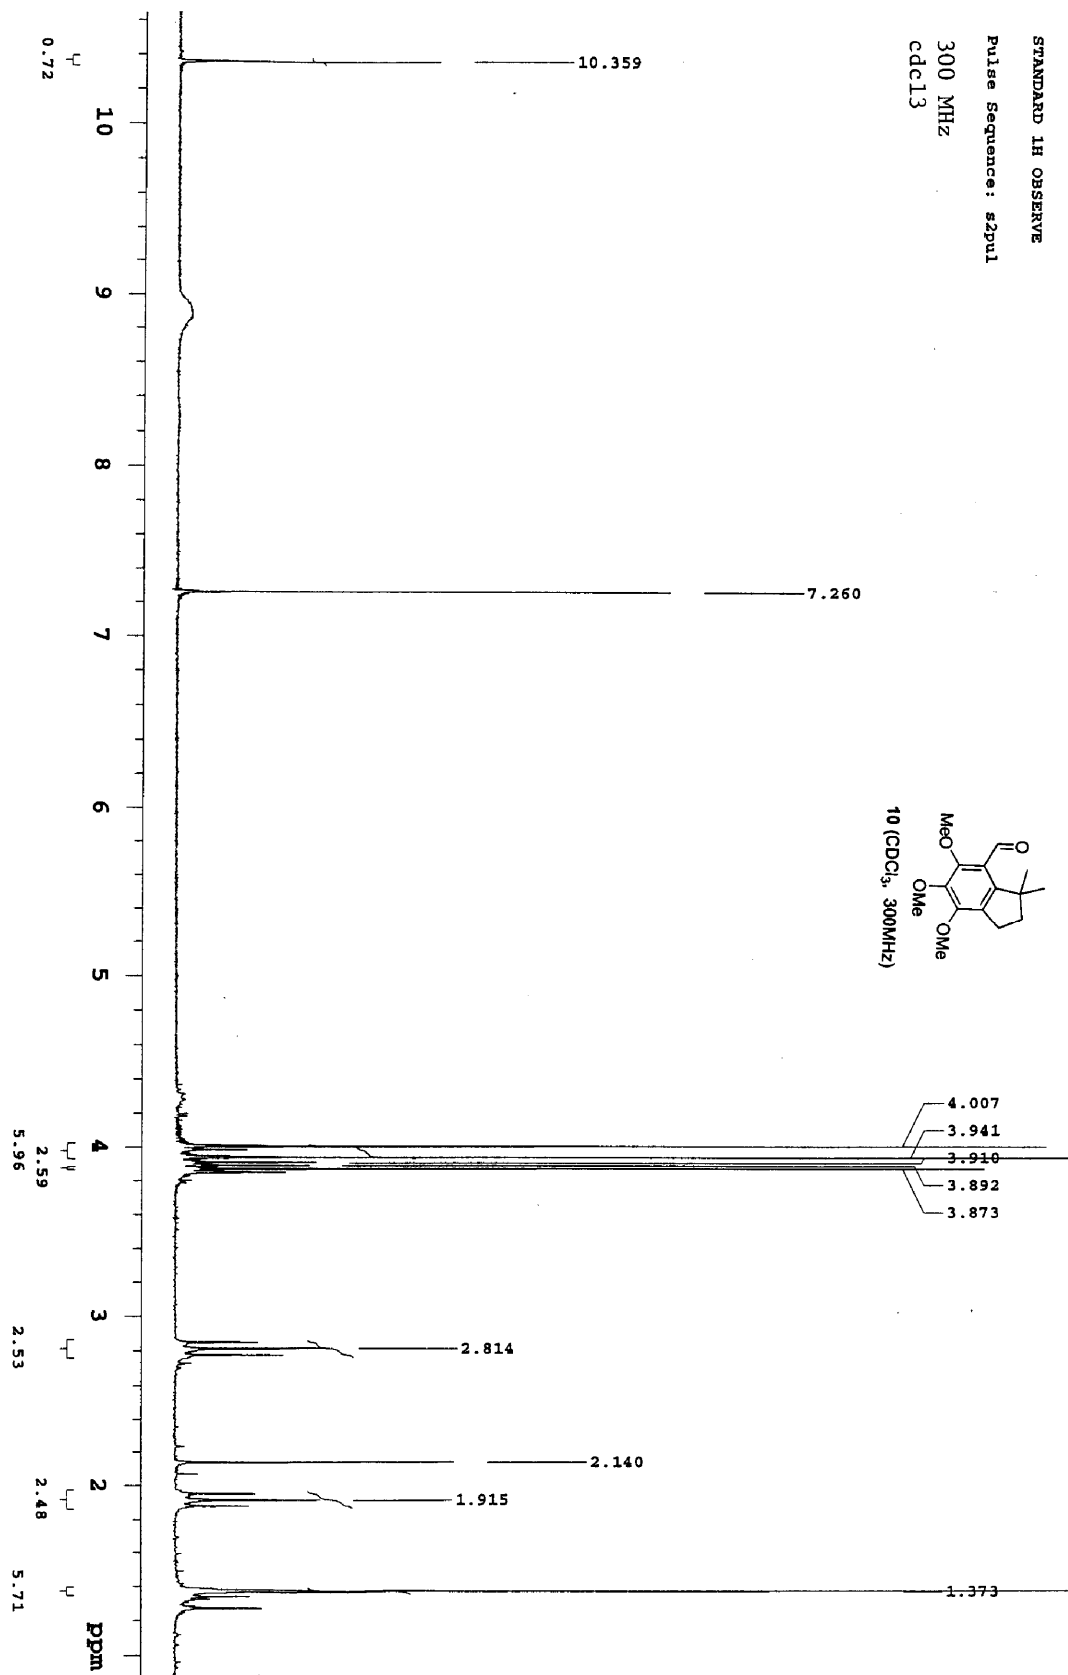

13C OBSERVE

Pulse Sequence: zgpg30

75 MHz  
cdcl3

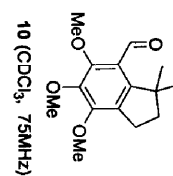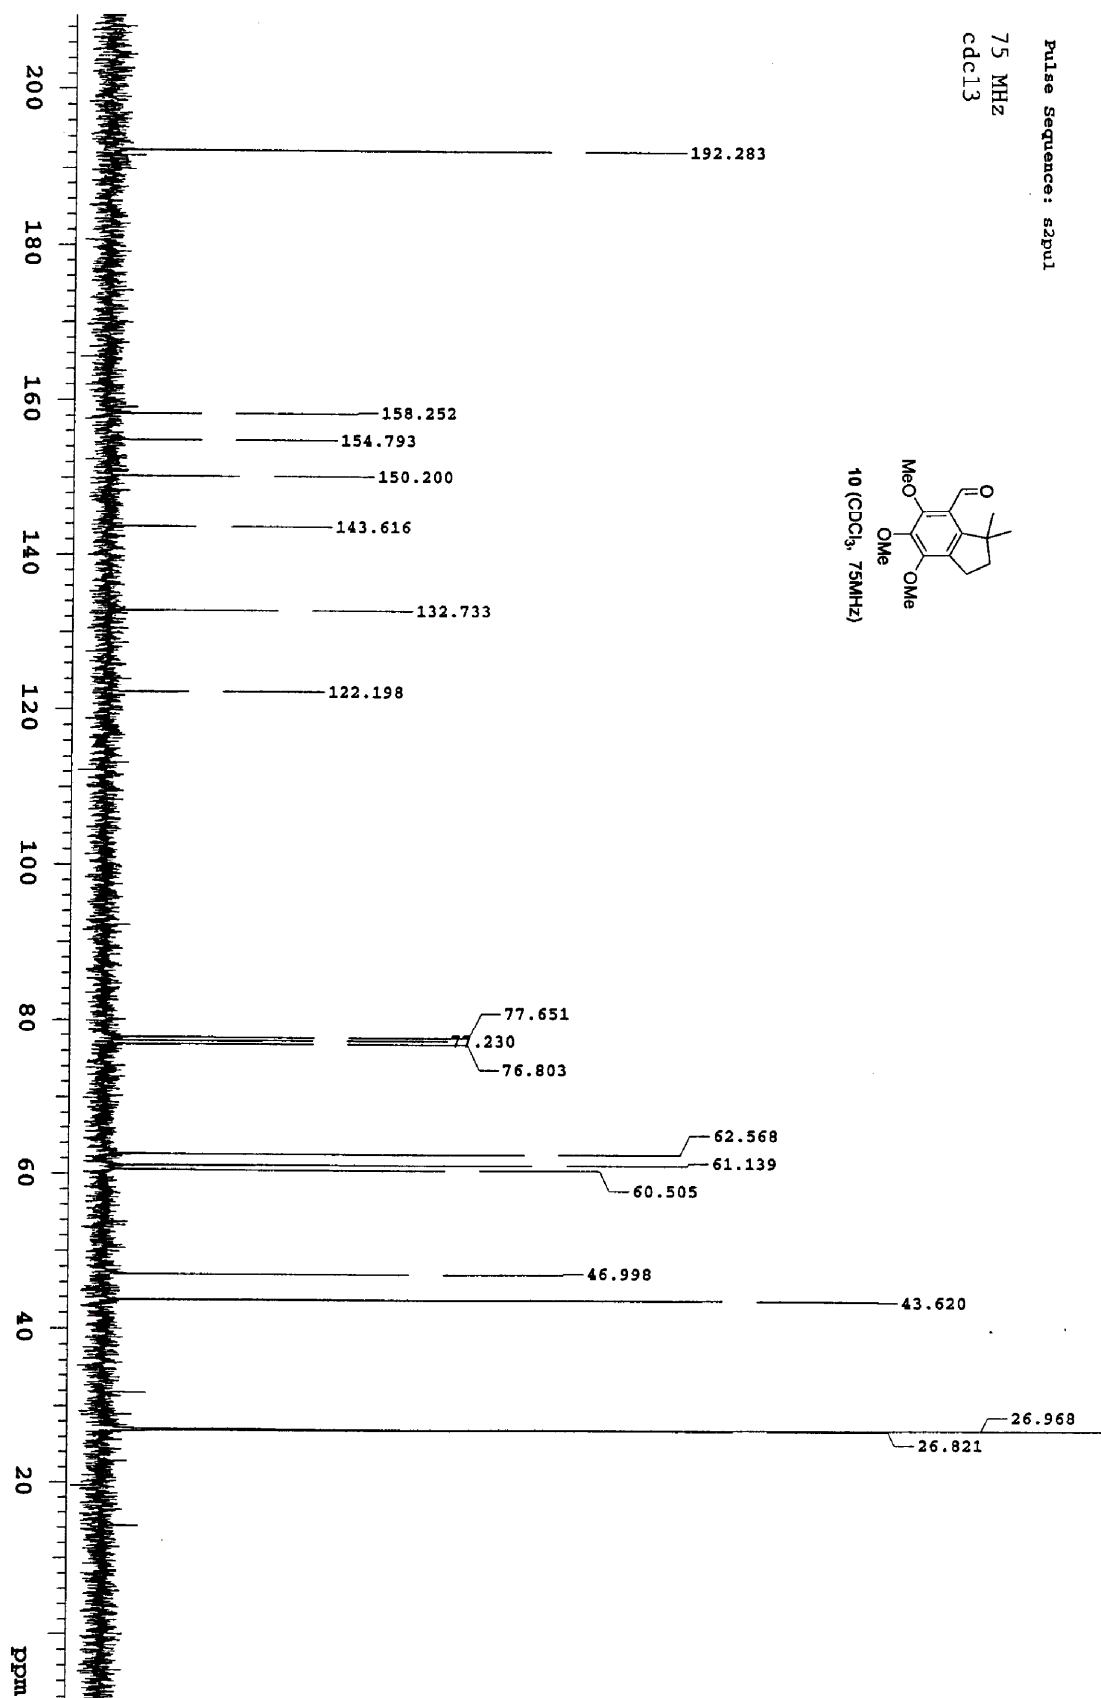

MDR-phenol (CDCl<sub>3</sub>, 300 MHz)

Pulse Sequence: szpul

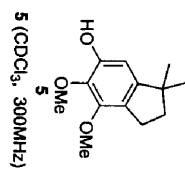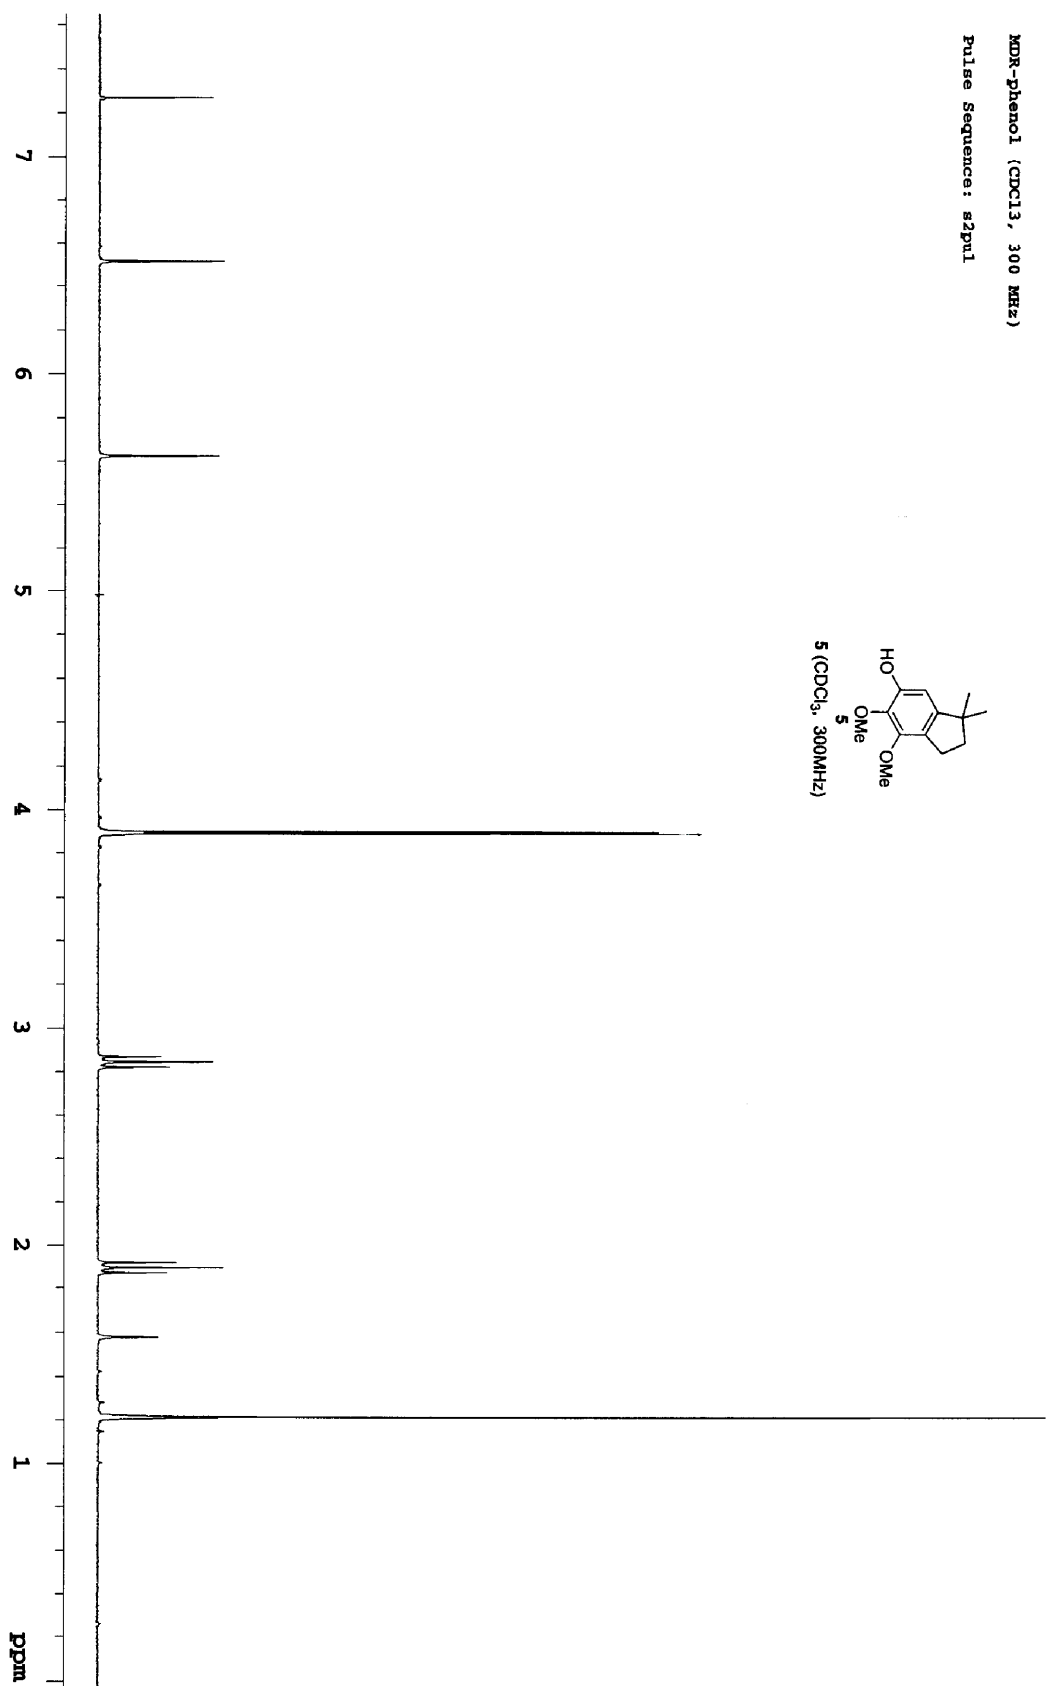

13C OBSERVE

Pulse Sequence: zgpg30

75 MHz  
cdcl3

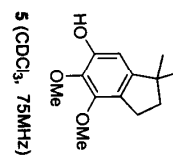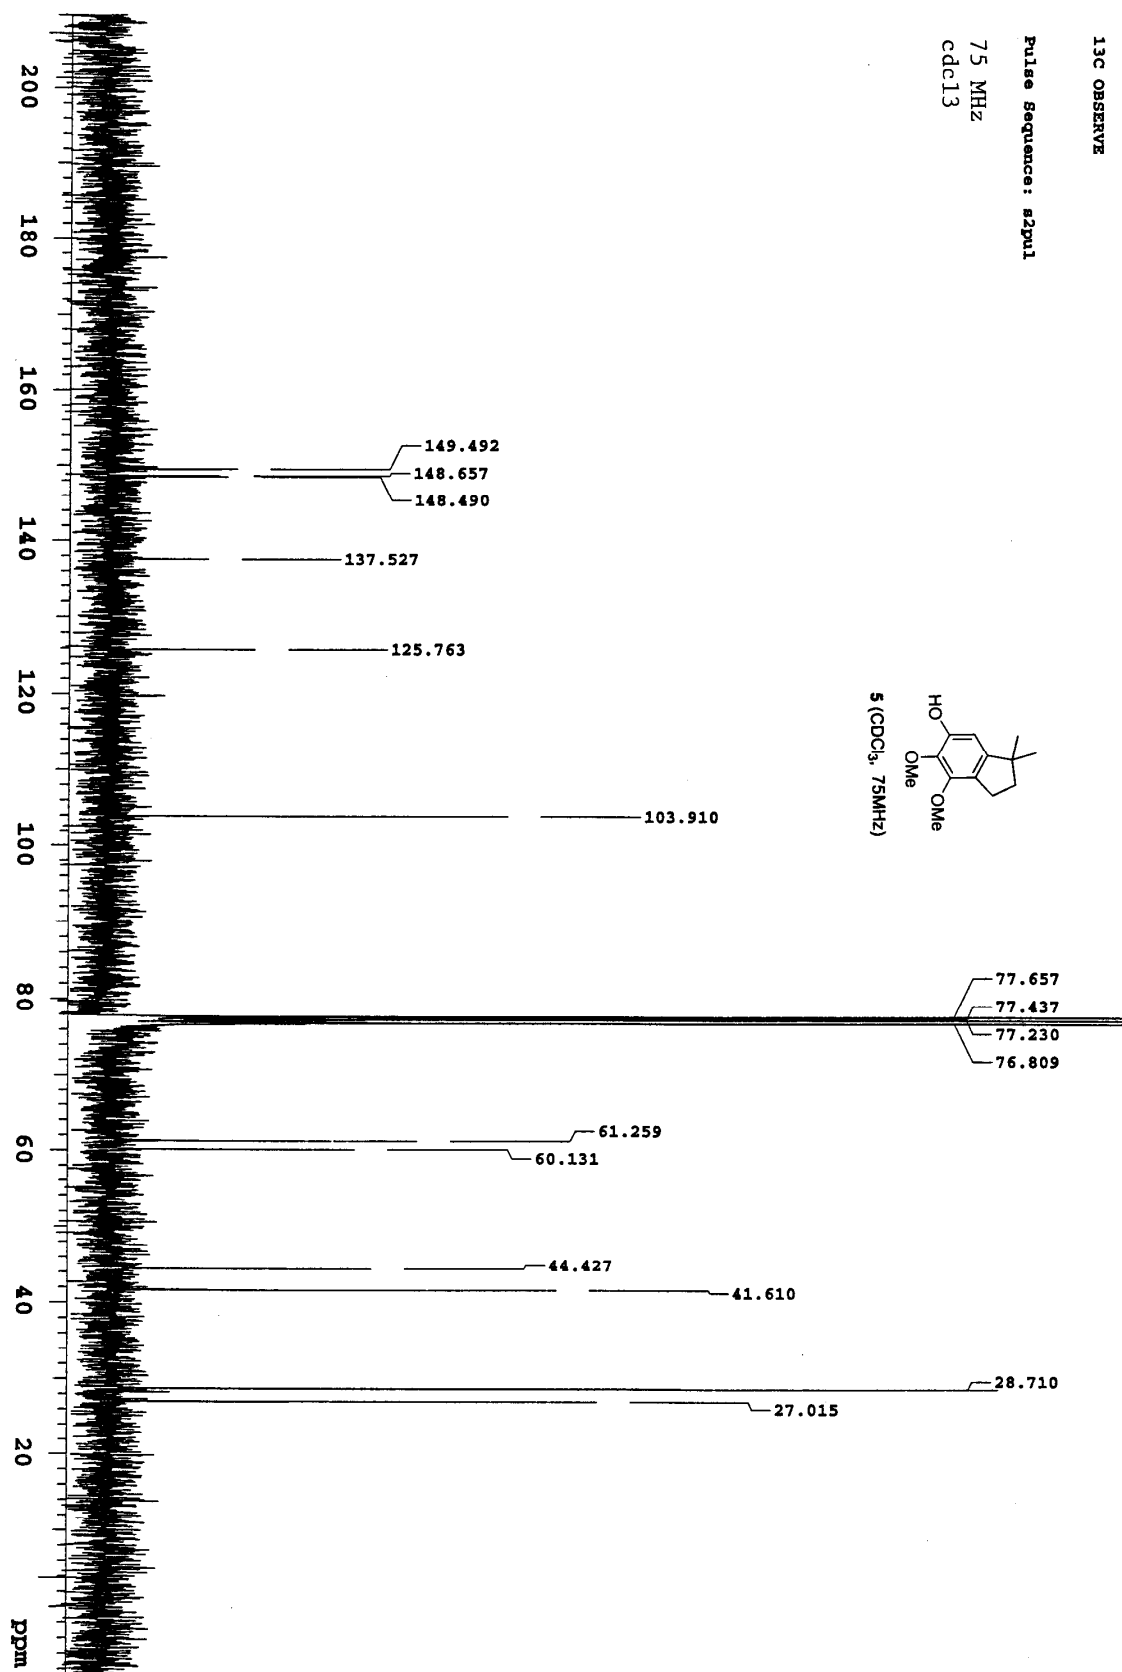

STANDARD 1H OBSERVE

Pulse Sequence: s2pul

200 MHz  
cdcl3

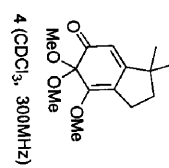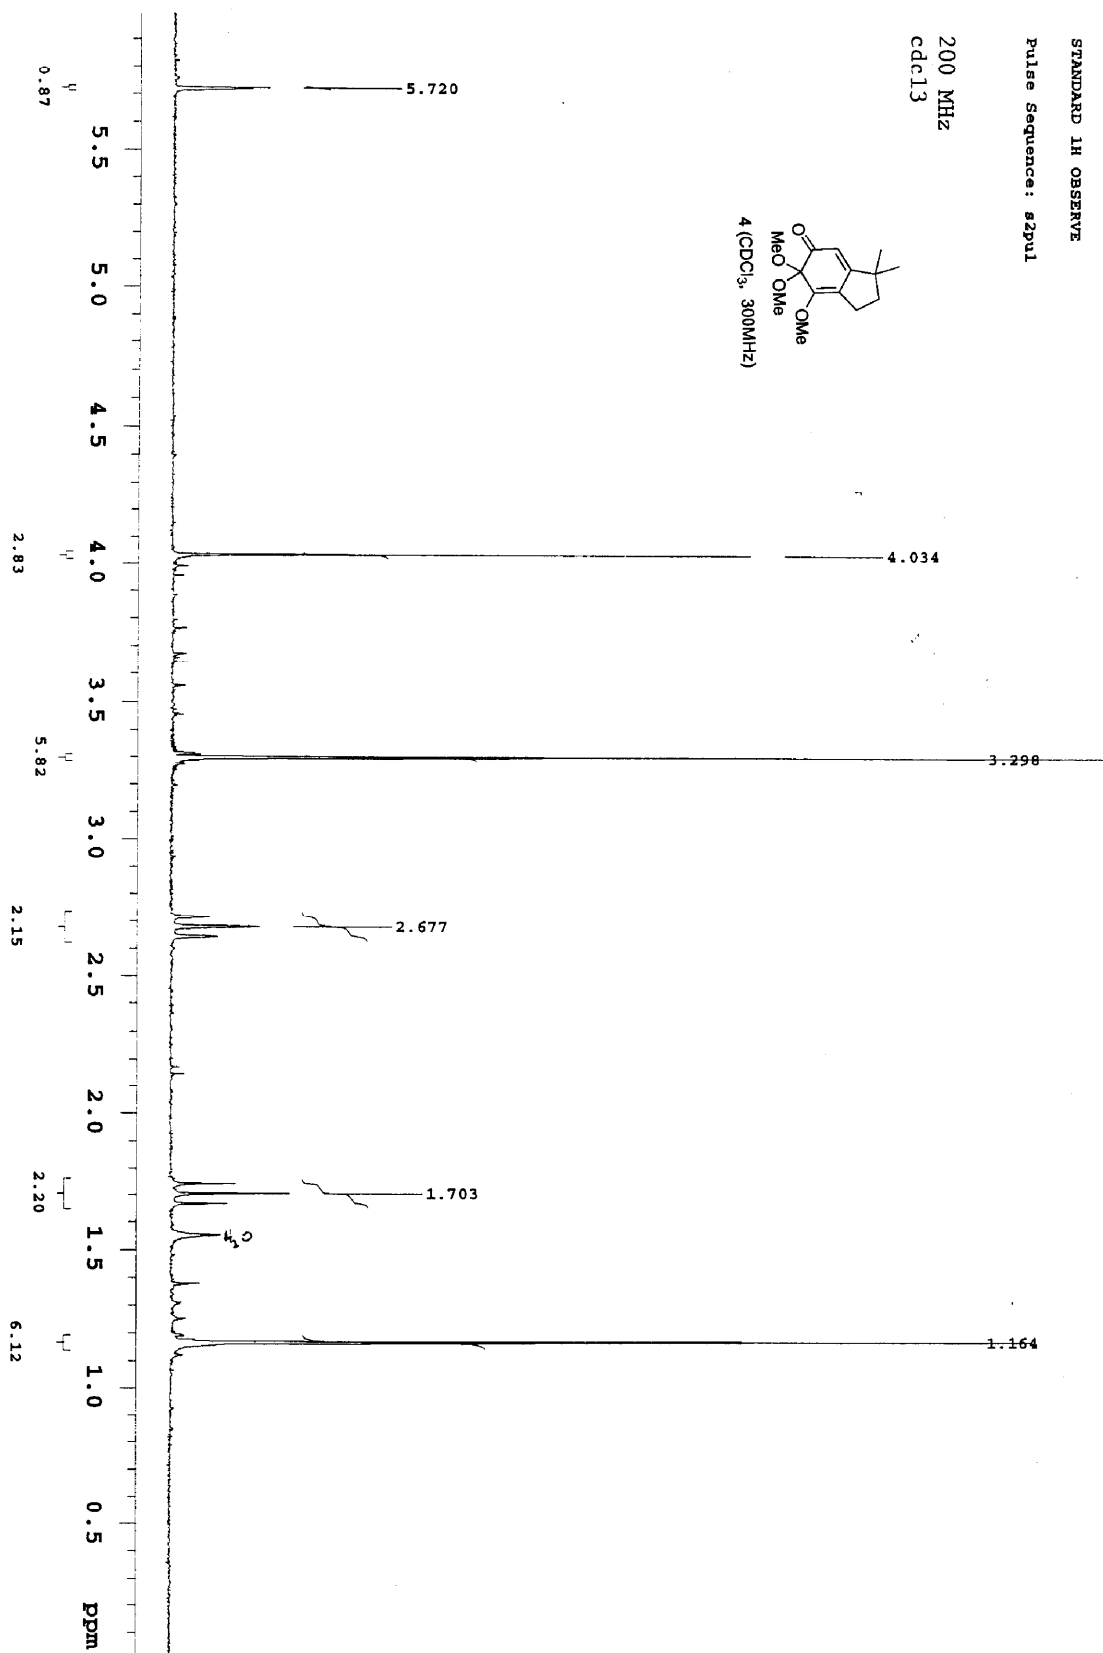

13C OBSERVE

Pulse Sequence: zgpg30  
75 MHz  
cdcl3

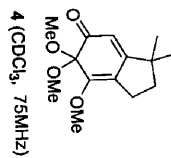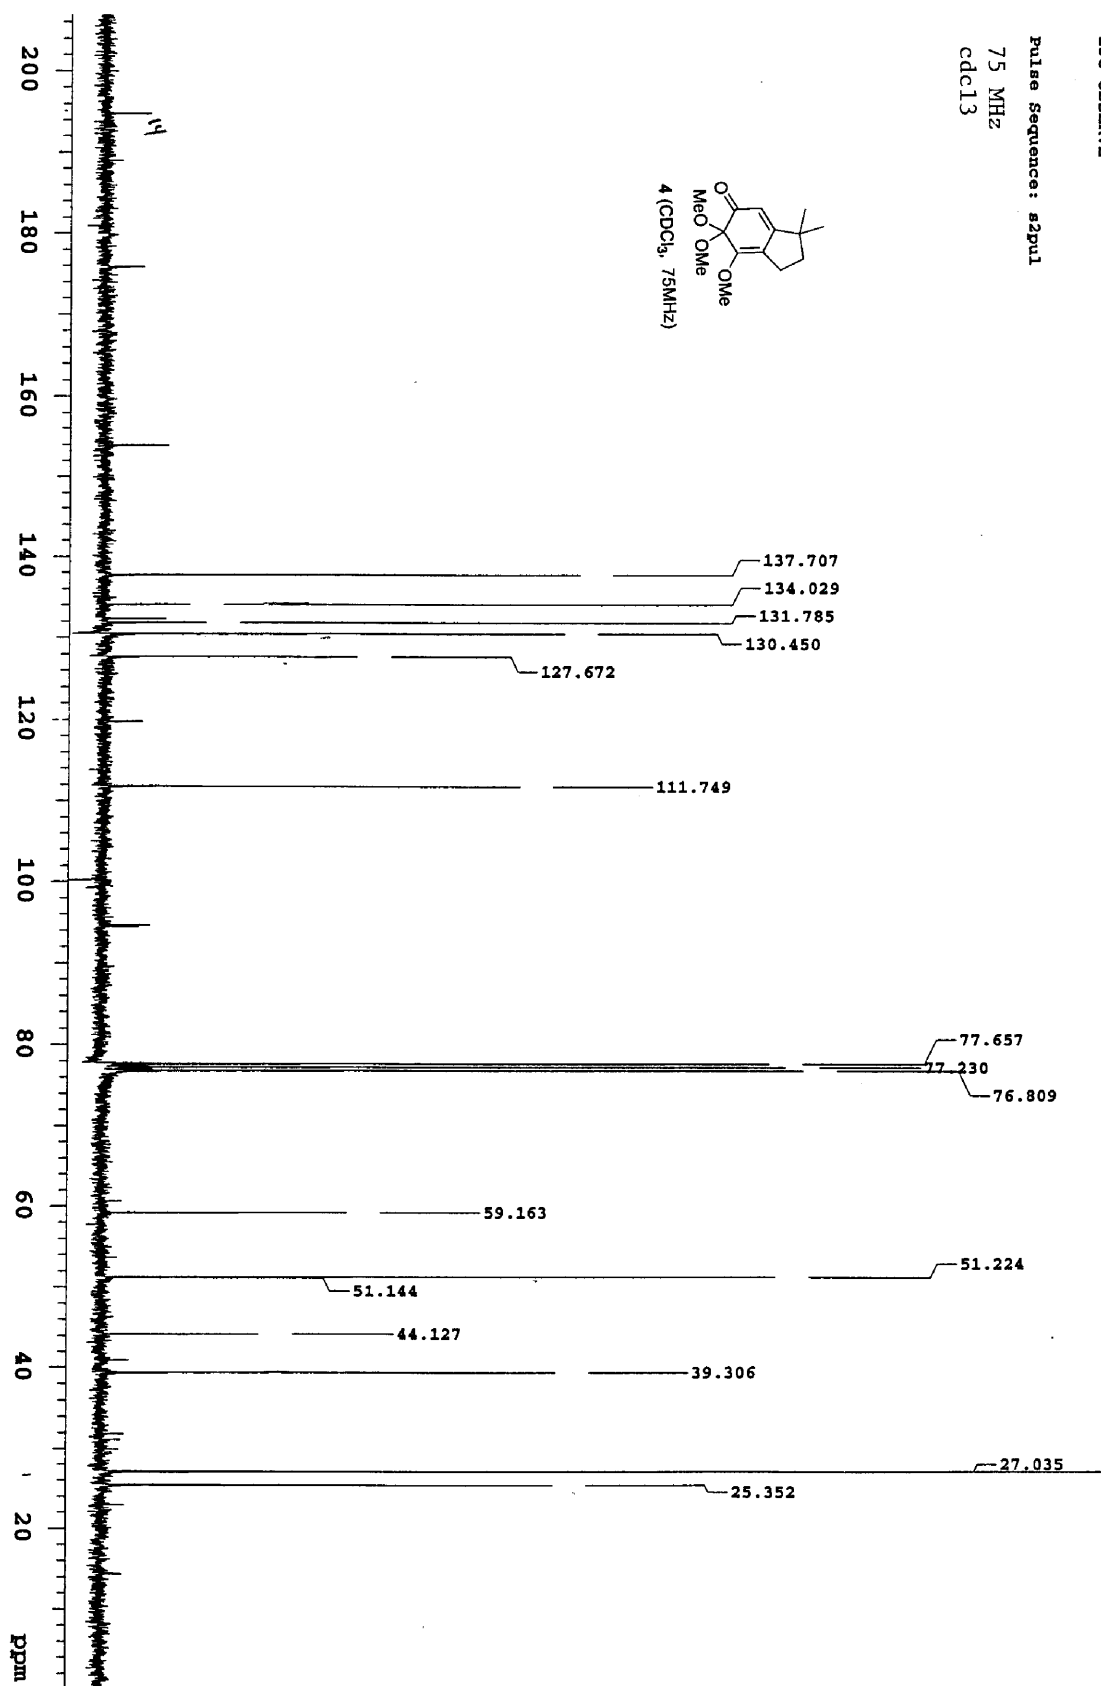

STANDARD 1H OBSERVE

Pulse Sequence: s2pul

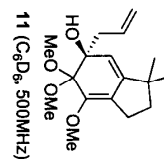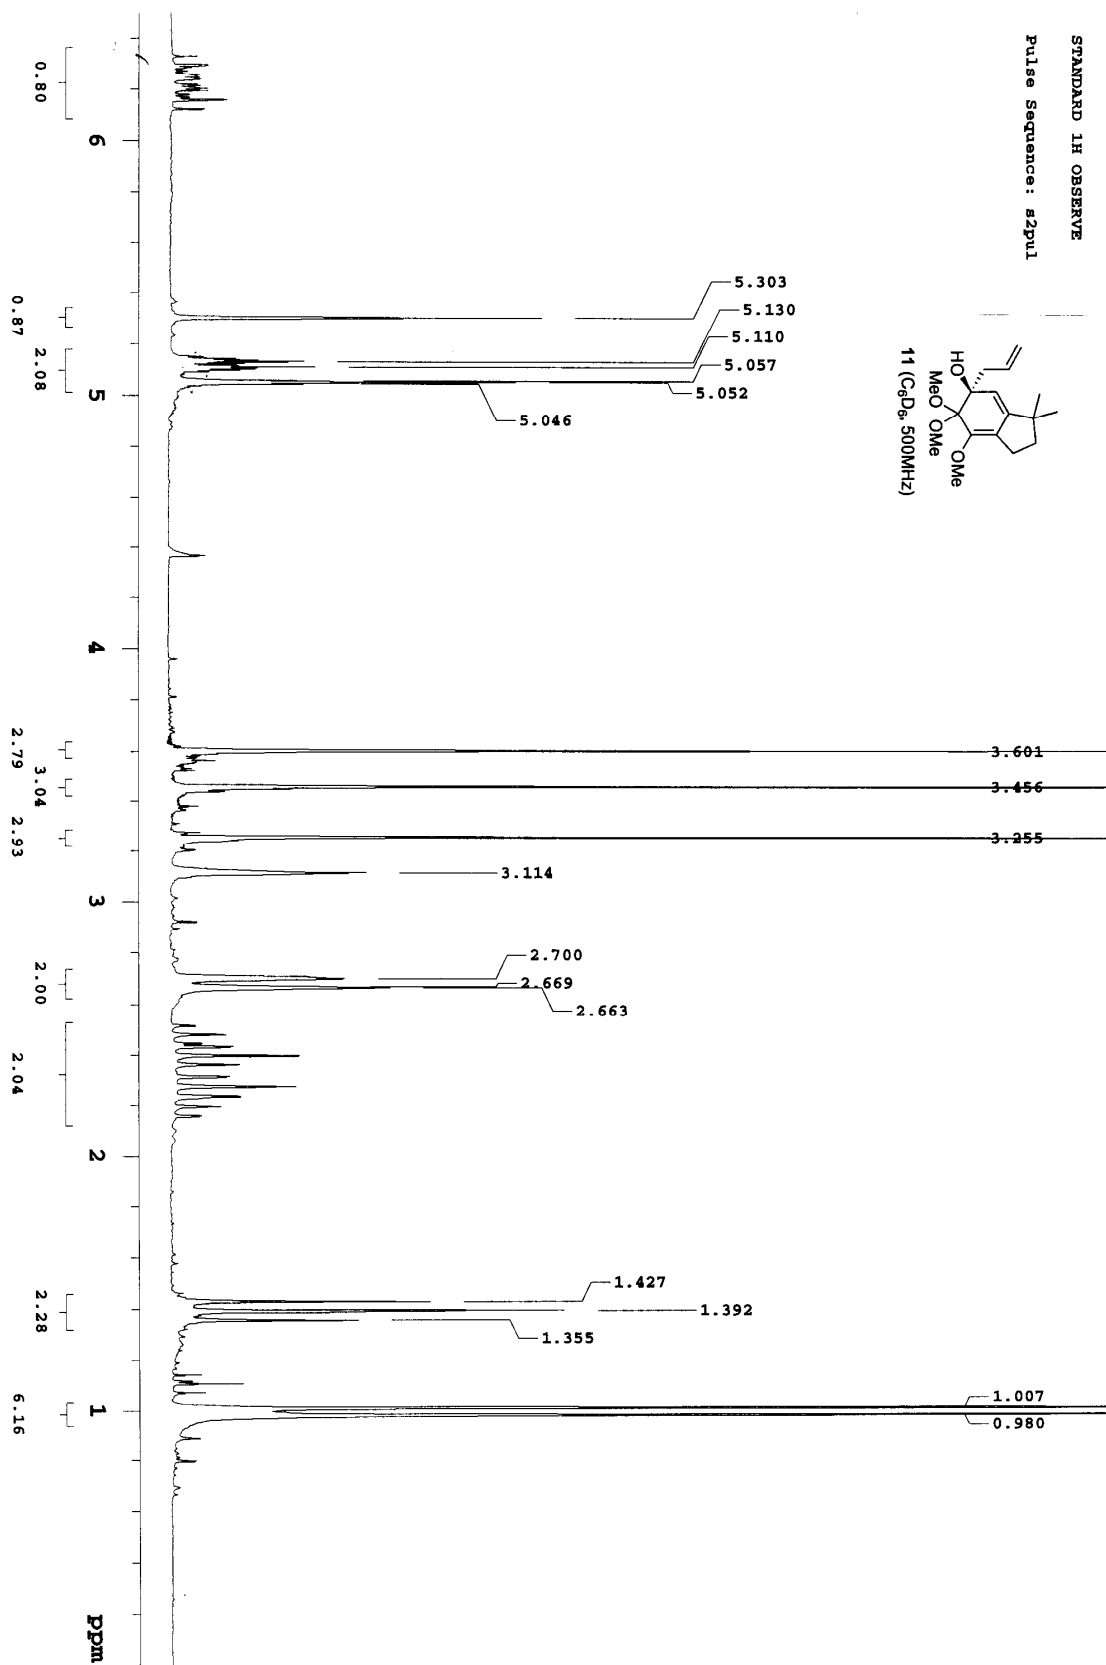

13C OBSERVE

Pulse Sequence: szpul

75 MHz  
benzene-d6

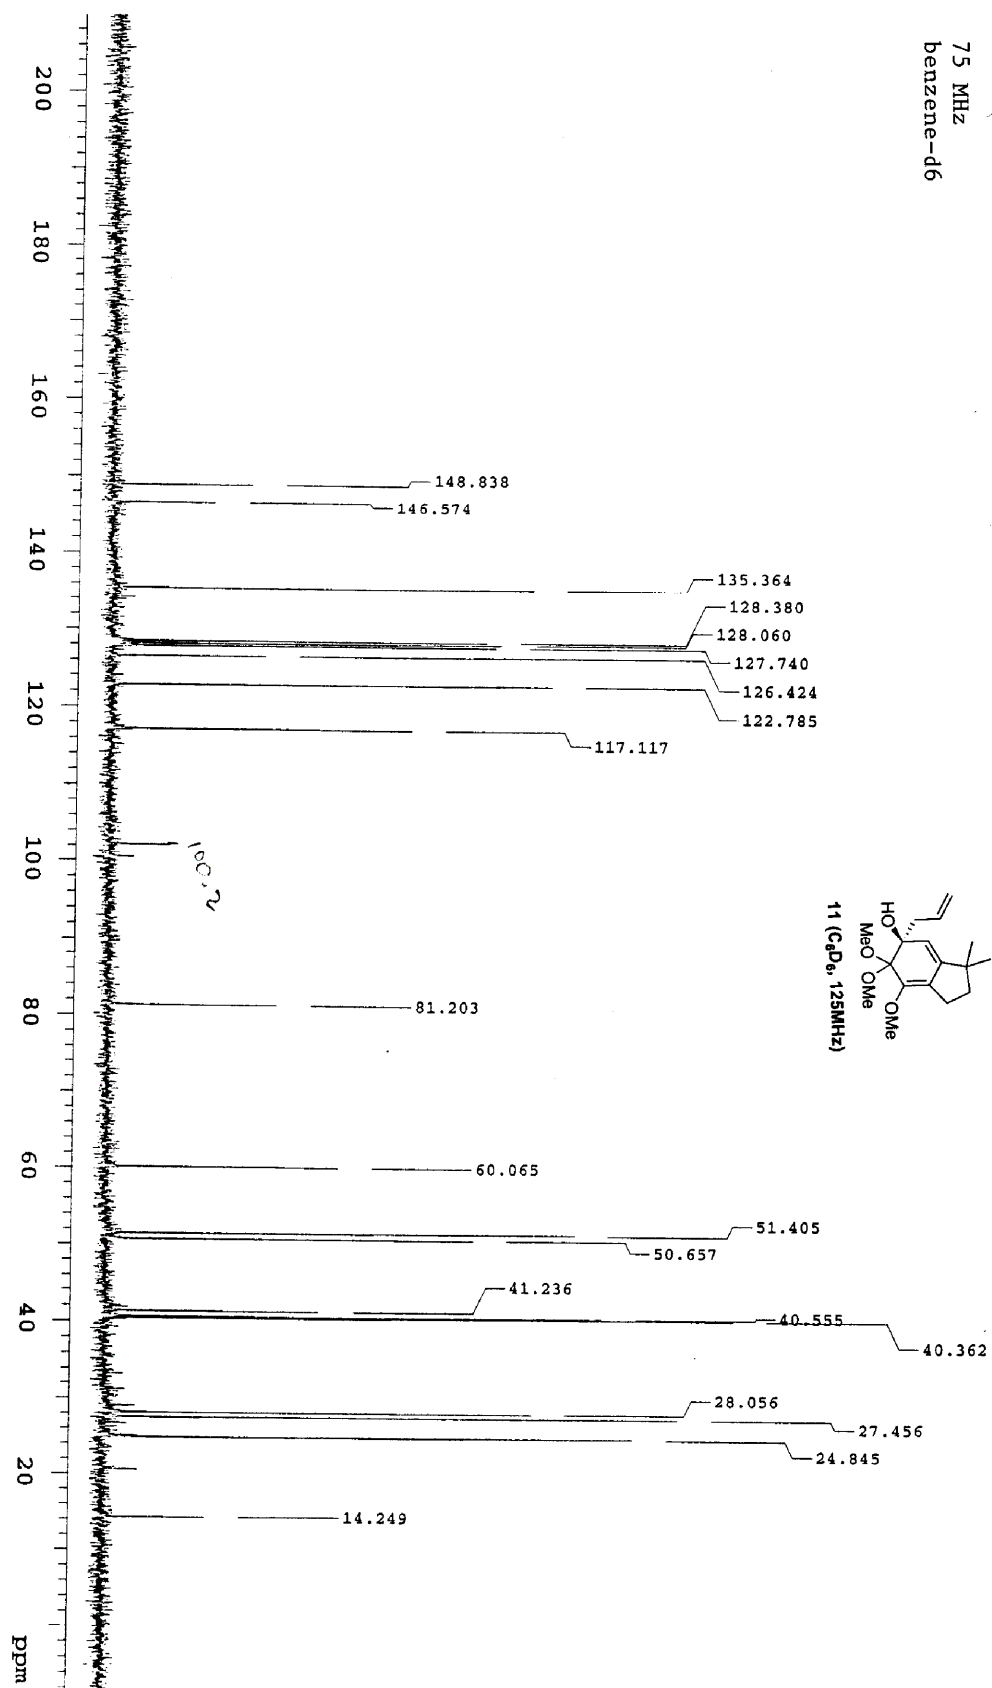



STANDARD 1K OBSERVE

Pulse Sequence: szpu1

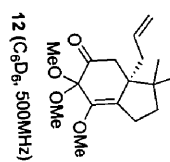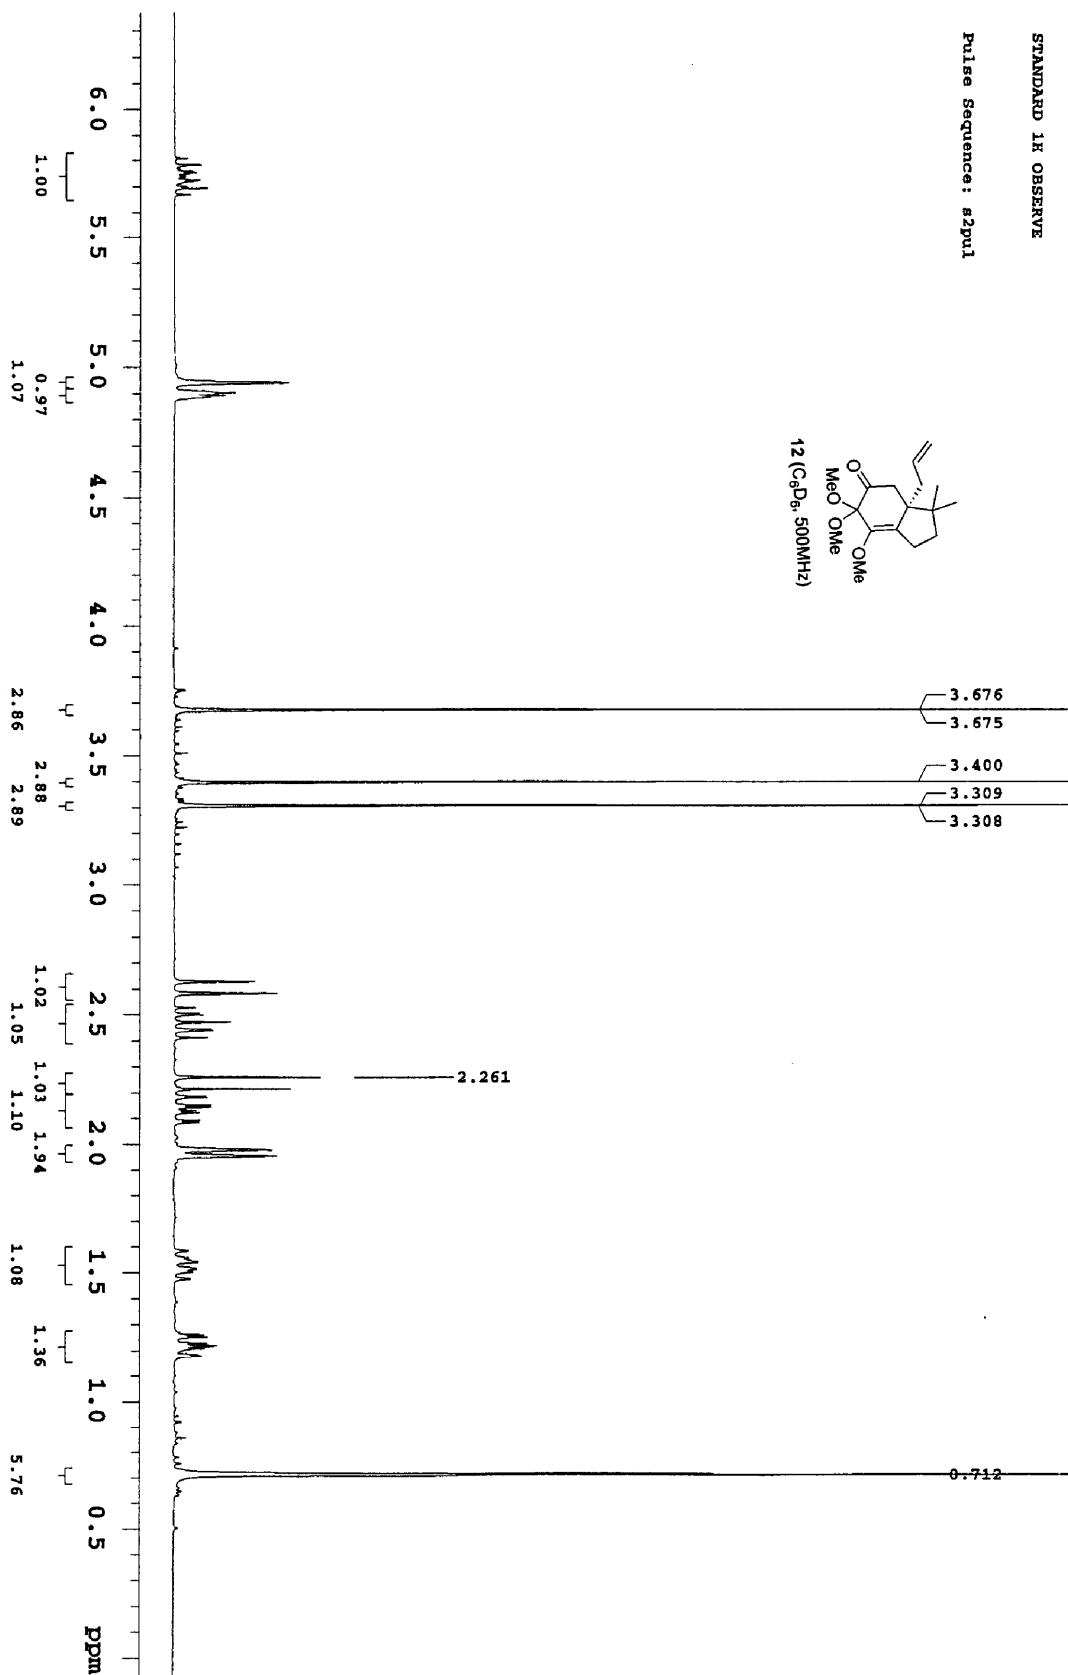

13C OBSERVE

Pulse Sequence: s2pul

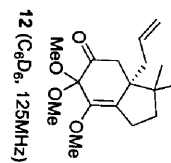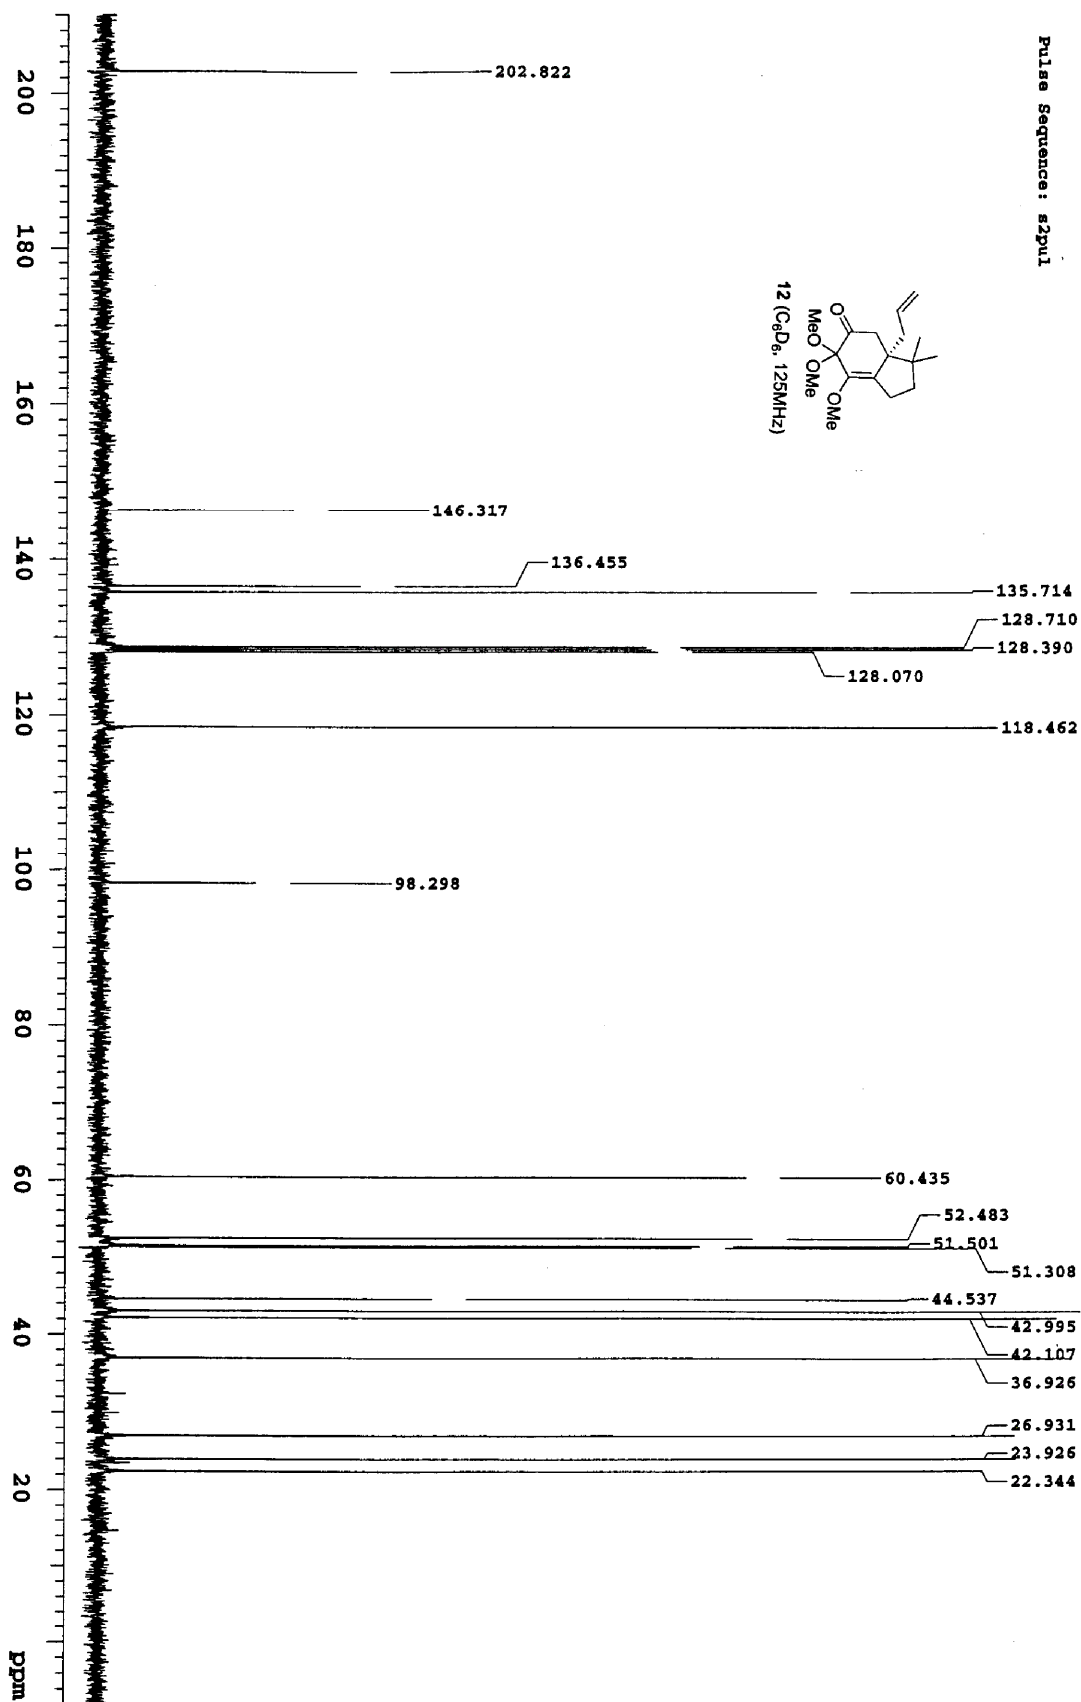

amine mats project

Pulse Sequence: szpul

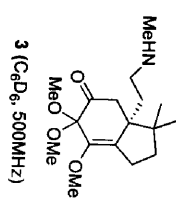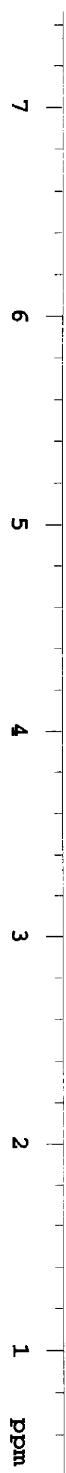

amine13C

Pulse Sequence: s2pul

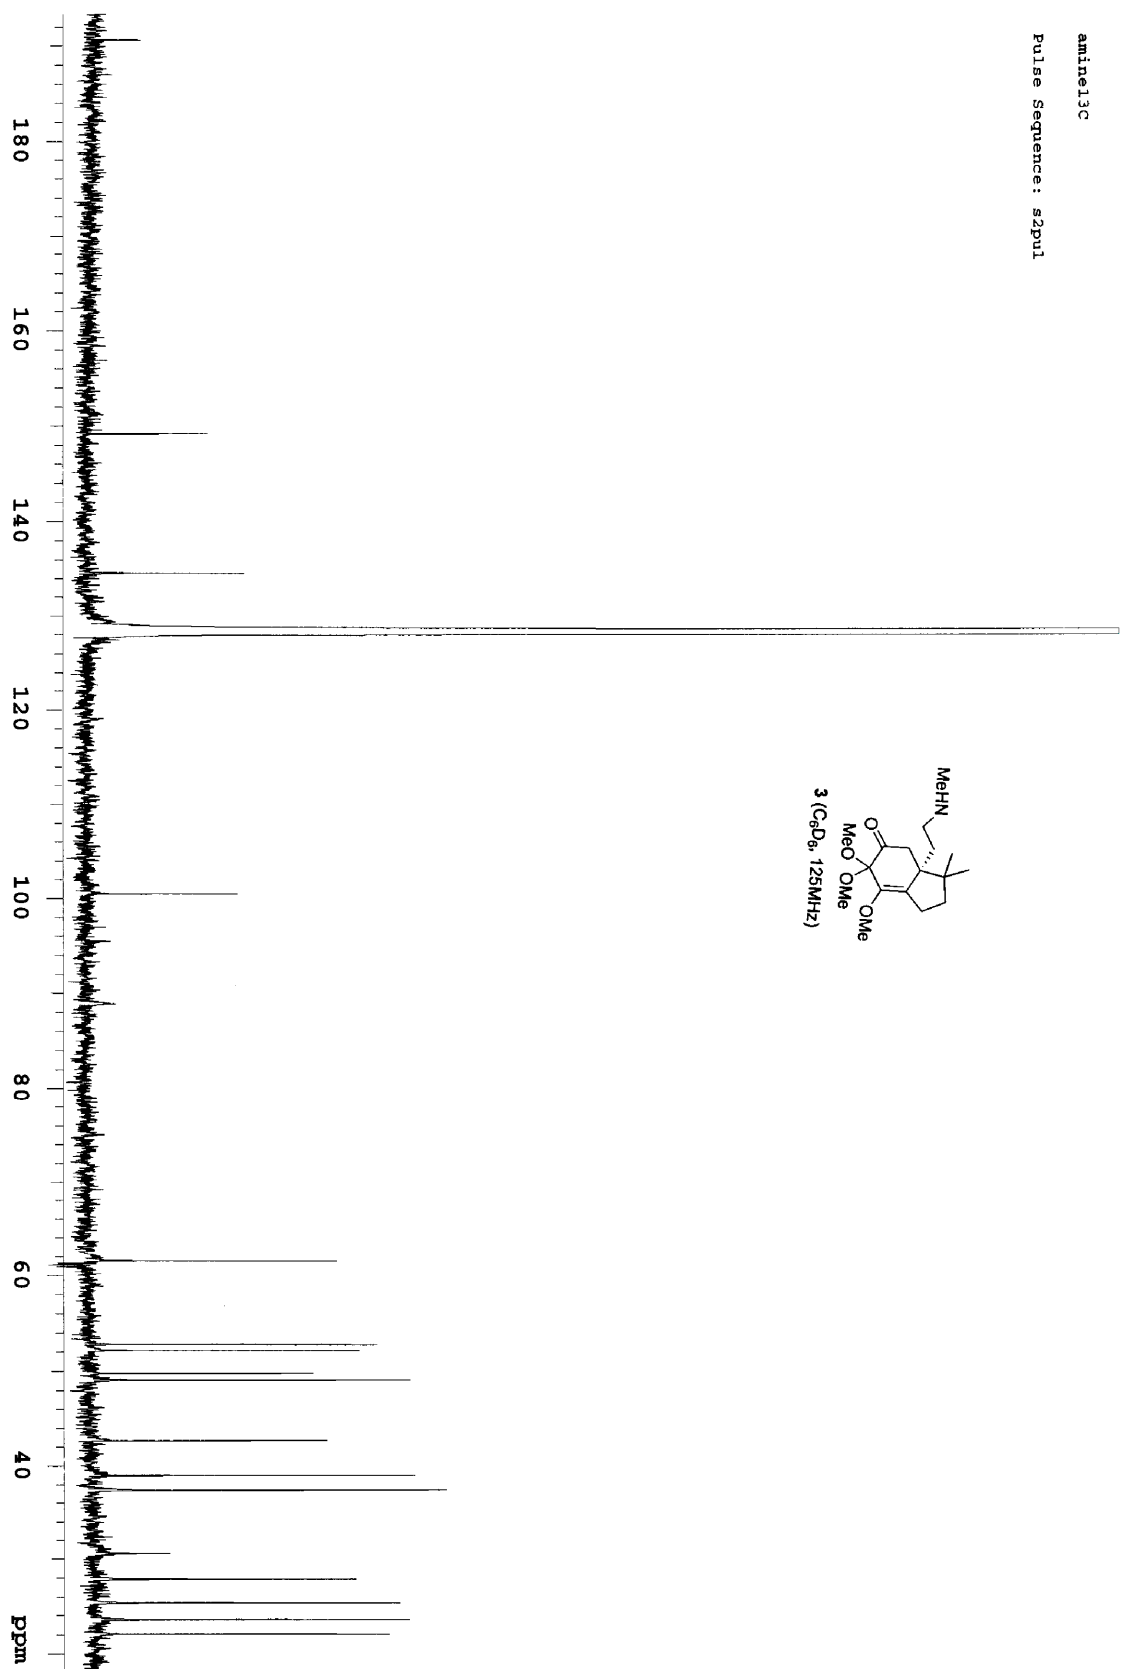

cycle enol pure

Pulse Sequence: szpul

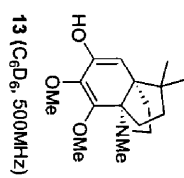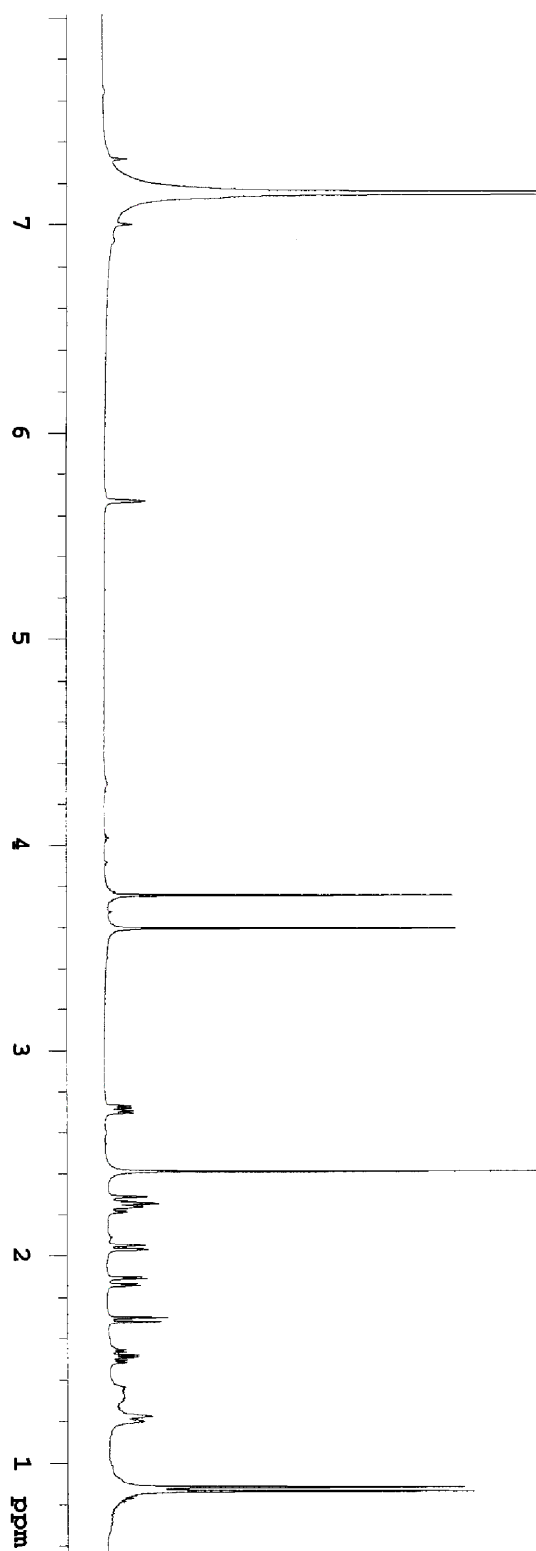

13cycclizedovernight  
Pulse Sequence: s2pul

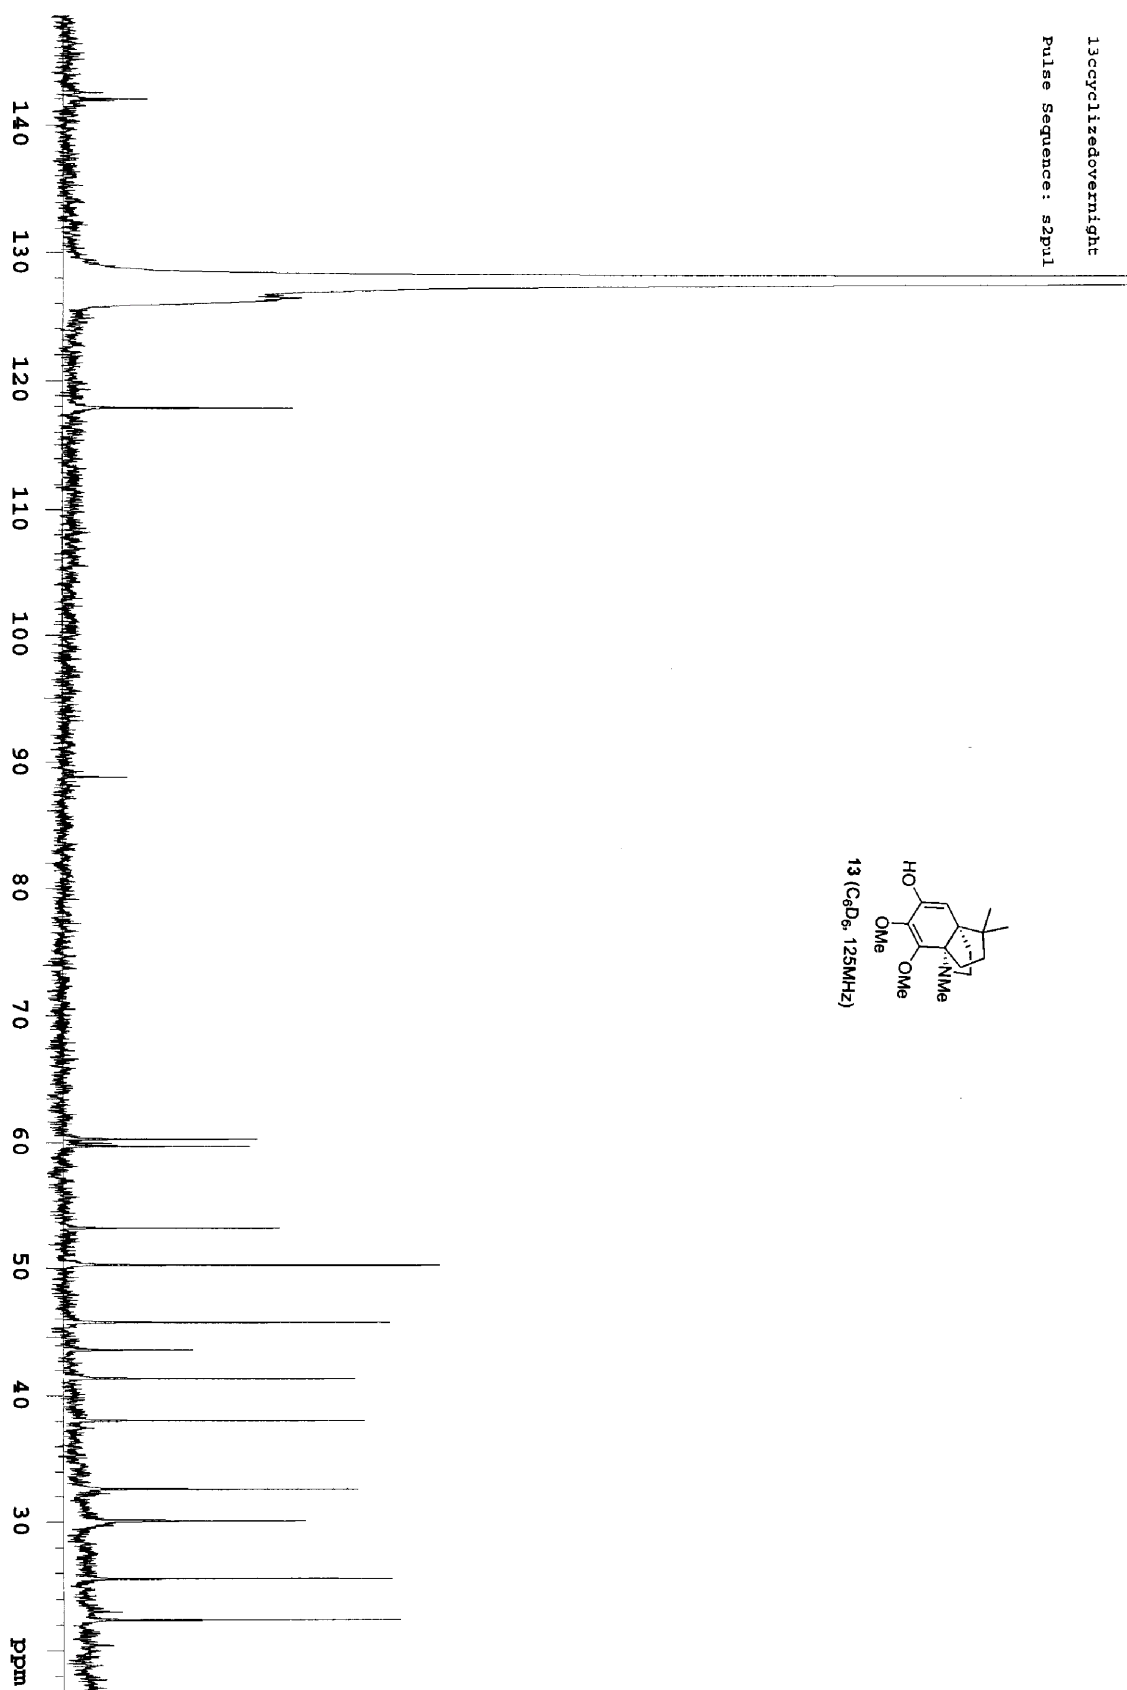

Supplement: Supplementary file 1 [file 5133856]
